# Supplementary material for: Volatiles of the Apicomplexan Alga Chromera velia and Associated Bacteria
Source: PubMed Central journal article supplement — Chembiochem. 2022 Dec 20;24(3):e202200530. doi: 10.1002/cbic.202200530 (PMC10107727; doi:10.1002/cbic.202200530), 2022-12-20
Supplement: CBIC-24-0-s001.pdf [file CBIC-24-0-s001.pdf]

# ChemBioChem

Supporting Information

## **Volatiles of the Apicomplexan Alga *Chromera velia* and Associated Bacteria**

Diana Koteska, Pia Marter, Sixing Huang, Silke Pradella, Jörn Petersen, and Stefan Schulz\*

## Volatiles of the Apicomplexan Alga *Chromera velia* and Associated Bacteria

Diana Koteska,<sup>[a]</sup> Pia Marter,<sup>[b]</sup> Sixing Huang,<sup>[b]</sup> Silke Pradella,<sup>[b]</sup> Jörn Petersen,<sup>[b]</sup> and Stefan Schulz\*<sup>[a]</sup>

**Abstract:** Volatiles released by the apicomplexan alga *Chromera velia* CCAP1602/1 and their associated bacteria were investigated. A metagenome analysis allowed the identification of the most abundant heterotrophic bacteria of the phycosphere, but the isolation of additional strains showed that metagenomics underestimated the complexity of the algal microbiome. However, the culture-independent approach revealed the presence of a planctomycete that likely represents a novel bacterial family. We analysed algal and bacterial volatiles by open-system-stripping analysis (OSSA) on Tenax TA desorption tubes, followed by thermodesorption, cryofocusing and GC/MS-analysis. The analyses of the alga and the abundant bacterial strains *Sphingopyxis litoris* A01A-101, *Algihabitans albus* A01A-324, "*Coralitalea corali*" A01A-333 and *Litoreibacter* sp. A01A-347 revealed sulfur- and nitrogen-containing compounds, ketones, alcohols, aldehydes, aromatic compounds, amides, one lactone, as well as typical algal products, apocarotenoids. The compounds were identified by gas chromatographic retention indices, comparison of mass spectra and syntheses of reference compounds. A major algal metabolite was 3,4,4-trimethylcyclopent-2-en-1-one, an apocarotenoid indicating the presence of carotenoids related to capsanthin, not reported from algae so far. A low overlap in volatiles bouquets between *C. velia* and the bacteria was found and the xenic algal culture almost exclusively released algal components.

### Table of Contents

|                                      |    |
|--------------------------------------|----|
| <b>Experimental procedures</b> ..... | 9  |
| <b>Synthetic procedures</b> .....    | 11 |
| <b>Mass spectra</b> .....            | 15 |
| <b>NMR Spectra</b> .....             | 16 |
| <b>References</b> .....              | 25 |

## Results

**Table S3.** VOCs identified in headspace extracts of *Sphingopyxis litoris* A01A-101.

| Compound                                          | RI (exp) <sup>[a]</sup> | RI (lit) <sup>[b]</sup> | Identification <sup>[c]</sup> | Rep 1 | Rep 2 | Rep 3 |
|---------------------------------------------------|-------------------------|-------------------------|-------------------------------|-------|-------|-------|
| Pentan-3-one ( <b>69</b> )                        | 738                     | 707                     | ms, ri                        | x     | xx    | xx    |
| 3-Methylpentan-2-one ( <b>63</b> )                | 765                     | 771 <sup>[d]</sup>      | ms, ri                        | xx    |       | xx    |
| 5-Methylhexan-3-one ( <b>72</b> )                 | 831                     | 858 <sup>[d]</sup>      | ms, ri                        | xx    | xx    |       |
| 4-Methylhexan-3-one ( <b>78</b> )                 | 831                     | 870 <sup>[d]</sup>      | ms, ri                        | xx    | xx    |       |
| 3-Methylpyridine ( <b>44</b> )                    | 860                     | 860                     | ms, ri                        | xx    | xx    | xx    |
| Hexanenitrile ( <b>39</b> )                       | 878                     | 879                     | ms, ri                        | x     | xx    | xx    |
| 5-Methylhex-4-en-3-one ( <b>80</b> )              | 895                     |                         | ms                            | xx    | xx    | xx    |
| 2,5-Dimethylpyridine ( <b>45</b> )                | 932                     | 928                     | ms, ri                        | xx    | xx    | xx    |
| ( <i>E</i> )-4-Methylhex-4-en-3-one ( <b>81</b> ) | 932                     | 934                     | ms, ri                        | xx    | xxx   | xx    |
| 3,5-Dimethylpyridine ( <b>46</b> )                | 978                     | 980                     | ms, ri                        |       | xx    | xx    |
| Heptanenitrile ( <b>40</b> )                      | 981                     | 985                     | ms, ri                        | xx    | xx    | xx    |
| 2,3,6-Trimethylpyridine ( <b>48</b> )             | 1008                    | 1009                    | ms, ri                        |       | xx    | xx    |
| 4-Cyanocyclohexene ( <b>52</b> )                  | 1018                    | 1028                    | ms, ri, syn                   | xx    |       |       |
| <i>N</i> -Isobutylacetamide ( <b>33</b> )         | 1036                    | 1027                    | ms, ri                        |       | xx    | xx    |
| 2,3,5-Trimethylpyridine ( <b>47</b> )             | 1057                    | 1060                    | ms, ri                        | xx    | xx    | xx    |
| Octanenitrile ( <b>41</b> )                       | 1083                    | 1082                    | ms, ri                        |       | xx    | xx    |
| Phorone ( <b>82</b> )                             | 1122                    | 1092                    | ms, ri                        |       | xx    | xx    |
| Unknown compound M [134]                          | 1134                    |                         |                               |       | xx    | xx    |
| <i>N</i> -(3-Methylpentyl)acetamide ( <b>34</b> ) | 1136                    |                         | ms                            |       | xx    | xx    |
| <i>N</i> -Isopentylacetamide ( <b>35</b> )        | 1143                    | 1150                    | ms, ri                        |       | xx    | xx    |
| 2-Acetyl-5-methylpyridine ( <b>49</b> )           | 1160                    |                         | ms                            |       | xx    | xx    |
| 2,5-Diisopropylpyrazine                           | 1189                    | 1200                    | ms, ri                        |       |       | xxx   |
| <i>N</i> -Isopentylpropionamide                   | 1215                    |                         | ms                            |       |       | xx    |
| Cyclohexyl isothiocyanate                         | 1235                    | 1231                    | ms, ri                        | xx    |       |       |
| 2-Isopropyl-5- <i>sec</i> -butylpyrazine          | 1273                    | 1279                    | ms, ri                        |       |       | xx    |
| Unknown compound M [208]                          | 1346                    |                         | ms                            | xxx   | xxx   | xxx   |
| <i>N</i> -(2-Phenylethyl)acetamide ( <b>37</b> )  | 1517                    | 1512                    | ms, ri                        |       | x     | xx    |

[a]The retention indices are averaged values of the measurements of all used replicates. [b] Retention indices were from NIST Chemistry WebBook or our own database. [c] The compounds were identified by comparison of the mass spectrum to a database spectrum (ms), comparison of the retention index to a published retention index on the same or similar GC fused silica capillary column (ri) or comparison to a synthetic or commercially (syn) available reference compound. [d] GC retention indices were calculated according to an empirical method.<sup>[51]</sup> exp = experimental. lit = literature. Rep = replicate. The amounts of the compounds are given as 0–2 % (x), 2–20 % (xx), 20–100 % (xxx) relative to the largest peak area in the total ion chromatogram.

**Table S4.** VOCs identified in the headspace extracts of *Algihabitans albus* A01A-324.

| Compound                                             | RI (exp) <sup>[a]</sup> | RI (lit) <sup>[b]</sup> | Identification <sup>[c]</sup> | Rep 1 | Rep 2 | Rep 3 |
|------------------------------------------------------|-------------------------|-------------------------|-------------------------------|-------|-------|-------|
| 4-Cyanocyclohexene ( <b>52</b> )                     | 1018                    | 1028                    | ms, ri, syn                   | xx    |       |       |
| <i>N</i> -Isobutylacetamide ( <b>33</b> )            | 1035                    | 1027                    | ms, ri                        |       |       | xx    |
| <i>N</i> -Isobutylpropionamide                       | 1107                    |                         | ms                            |       |       | xx    |
| <i>N</i> -(2-methylbutyl)acetamide ( <b>34</b> )     | 1136                    |                         | ms                            |       | xx    | xx    |
| <i>N</i> -Isopentylacetamide ( <b>35</b> )           | 1144                    | 1150                    | ms, ri                        |       | xx    | xx    |
| Tropone ( <b>91</b> )                                | 1159                    | 1182                    | ms, ri                        | xx    | xx    | xx    |
| 2,5-Diisopropylpyrazine                              | 1190                    | 1200                    | ms, ri                        |       |       | xx    |
| Tropolone                                            | 1204                    |                         | ms                            | xx    |       | x     |
| 1-(2,6,6-Trimethylcyclohex-2-en-1-yl)pent-1-en-3-one | 1524                    | 1503                    | ms, ri                        | xx    |       |       |

[a]The retention indices are averaged values of the measurements of all used replicates. [b] Retention indices were from NIST Chemistry WebBook or our own database. [c] The compounds were identified by comparison of the mass spectrum to a database spectrum (ms), comparison of the retention index to a published retention index on the same or similar GC fused silica capillary column (ri) or comparison to a synthetic or commercially available reference compound. [d] GC retention indices were calculated according to an empirical method developed by Schulz et al.<sup>[S2]</sup> exp = experimental. lit = literature, Rep = replicate. The amounts of the compounds are given as 0–2 % (x), 2–20 % (xx), 20–100 % (xxx) relative to the largest peak area in the total ion chromatogram.

**Table S5.** VOCs identified in the headspace extracts *Coralitalea coralii* A01A-333.

| Compound                                             | RI (exp) <sup>[a]</sup> | RI lit <sup>[b]</sup> | Identification <sup>[c]</sup> | Rep 1 | Rep 2 | Rep 3 |
|------------------------------------------------------|-------------------------|-----------------------|-------------------------------|-------|-------|-------|
| Hexane-3,4-dione ( <b>92</b> )                       | 801                     | 800                   | ms, ri                        | xx    | xx    |       |
| 2-Hydroxypentan-3-one ( <b>95</b> )                  | 812                     | 821                   | ms, ri                        | xx    | xxx   | xxx   |
| 4-Thiapentan-2-one ( <b>31</b> )                     | 838                     | 863                   | ms, ri                        |       | xx    | x     |
| 2,4,5-Trimethyloxazole ( <b>50</b> )                 | 844                     | 846                   | ms, ri                        |       | xx    | xx    |
| 5-Methylhexan-2-one ( <b>55</b> )                    | 854                     | 862 <sup>[d]</sup>    | ms, ri                        | xx    | xx    | xx    |
| ( <i>E</i> )-Hex-2-en-1-ol                           | 875                     | 874                   | ms, ri                        | xx    |       |       |
| <i>S</i> -methyl 3-methylbutanethioate ( <b>32</b> ) | 937                     | 938                   | ms, ri                        | xx    | xx    |       |
| 6-Methylheptan-2-one ( <b>56</b> )                   | 954                     | 963 <sup>[d]</sup>    | ms, ri                        | xx    | xx    | xx    |
| 5-Methylheptan-2-one ( <b>64</b> )                   | 964                     | 972 <sup>[d]</sup>    | ms, ri                        | xxx   | xxx   | xx    |
| Dimethyl trisulfide ( <b>29</b> )                    | 966                     | 965                   | ms, ri                        | xxx   | xxx   | xx    |
| 3-Pyridinecarbonitrile ( <b>43</b> )                 | 1007                    | 1007                  | ms, ri                        |       | xx    | xx    |
| Cyclohept-4-en-1-one ( <b>90</b> )                   | 1008                    | 1004 <sup>[S3]</sup>  | ms, ri                        |       | xx    | xx    |
| Unknown compound M [126]                             | 1024                    |                       |                               |       | xx    | xx    |
| 7-Methyloctan-2-one ( <b>57</b> )                    | 1056                    | 1063 <sup>[d]</sup>   | ms, ri                        | xx    | xxx   | xx    |
| 2,3,5,6-Tetramethylpyrazine                          | 1087                    | 1087                  | ms, ri                        |       | xxx   |       |

|                                                  |      |                     |        |     |     |     |
|--------------------------------------------------|------|---------------------|--------|-----|-----|-----|
| <i>cis</i> -Hexahydrophthalid-isomer             | 1091 |                     |        |     |     | XX  |
| Unknown compound M [172] a1                      | 1100 |                     |        | XXX | XX  |     |
| 2-Phenylethanol ( <b>8</b> )                     | 1114 | 1114                | ms, ri | XXX | XXX | XXX |
| 2,3,5-Trithiahexane ( <b>30</b> )                | 1125 | 1130                | ms, ri | XX  | XX  |     |
| 1-Phenylpropan-2-one ( <b>9</b> )                | 1131 | 1124                | ms, ri | XXX | XXX | XXX |
| <i>N</i> -Isopentylacetamide ( <b>35</b> )       | 1140 | 1150                | ms, ri |     | XX  | XX  |
| 8-Methylnonan-3-one ( <b>73</b> )                | 1151 | 1158 <sup>[d]</sup> | ms, ri | XX  | XX  |     |
| 8-Methylnonan-2-one ( <b>58</b> )                | 1158 | 1163 <sup>[d]</sup> | ms, ri | XX  | XXX | XX  |
| Tropone ( <b>91</b> )                            | 1158 | 1182                | ms, ri |     | XX  | XX  |
| 7-Methylnonan-2-one ( <b>66</b> )                | 1164 | 1172 <sup>[d]</sup> | ms, ri | XXX | XXX | XXX |
| Methyl 2-phenylacetate                           | 1166 | 1165                | ms, ri |     |     | XX  |
| Unknown compound M [172] a2                      | 1172 |                     |        | XXX | XX  | X   |
| Unknown compound b1                              | 1179 |                     |        | XX  | XX  | XX  |
| Unknown compound c1                              | 1190 |                     |        | XX  | XX  | XX  |
| Dimethyl tetrasulfide                            | 1213 | 1215                | ms, ri | XXX |     |     |
| $\beta$ -Phenylethyl isocyanate ( <b>11</b> )    | 1224 | 1225                | ms, ri |     | XX  | XX  |
| Cyclohexyl isothiocyanate                        | 1231 | 1231                | ms, ri | XX  |     |     |
| Unknown compound b2                              | 1249 |                     | ms, ri | XX  |     |     |
| Unknown compound c2                              | 1252 |                     | ms, ri | XX  |     |     |
| 9-Methyldecan-3-one                              | 1254 | 1260 <sup>[d]</sup> | ms, ri |     | XX  |     |
| 9-Methyldecan-2-one ( <b>59</b> )                | 1258 | 1264 <sup>[d]</sup> | ms, ri | XXX | XXX | XX  |
| 2-Aminoacetophenone ( <b>15</b> )                | 1302 | 1302                | ms, ri | XXX | XXX | XXX |
| Unknown compound M [196]                         | 1330 |                     |        |     | XX  |     |
| 10-Methyl-3-undecanone ( <b>74</b> )             | 1355 | 1358 <sup>[d]</sup> | ms, ri | XXX | XXX | XX  |
| Unknown compound M [166]                         | 1357 |                     |        | XX  |     |     |
| 10-Methylundecan-2-one ( <b>60</b> )             | 1359 | 1366 <sup>[d]</sup> | ms, ri | XX  | XXX | XX  |
| 9-Methylundecan-2-one ( <b>68</b> )              | 1366 | 1373 <sup>[d]</sup> | ms, ri | XXX | XXX | XXX |
| Unknown compound M [198]                         | 1416 |                     |        | XX  | XX  | XX  |
| ( <i>Z</i> )-Geranylacetone ( <b>88</b> )        | 1436 | 1434                | ms, ri | XX  | XX  | XX  |
| ( <i>E</i> )-Geranylacetone ( <b>85</b> )        | 1455 | 1458                | ms, ri | XX  | XXX | XXX |
| 11-Methyldodecan-3-one ( <b>75</b> )             | 1461 | 1458 <sup>[d]</sup> | ms, ri | XXX | XXX | XX  |
| 11-Methyldodecan-2-one                           | 1461 | 1461 <sup>[d]</sup> | ms, ri |     |     | XX  |
| <i>N</i> -(2-Phenylethyl)formamide ( <b>36</b> ) | 1485 | 1487                | ms, ri |     | XX  | XX  |
| Unknown compound M [196]                         | 1486 |                     |        | XX  |     |     |
| <i>N</i> -(2-Phenylethyl)acetamide ( <b>37</b> ) | 1515 | 1512                | ms, ri |     | XXX | XXX |

|                                                                               |      |                     |        |     |     |     |
|-------------------------------------------------------------------------------|------|---------------------|--------|-----|-----|-----|
| (3 <i>E</i> ,5 <i>Z</i> )-6,10-dimethylundeca-3,5,9-trien-2-one ( <b>89</b> ) | 1534 | 1535                | ms, ri |     | xx  | xx  |
| Unknown compound M [218]                                                      | 1540 |                     |        |     | xx  | xx  |
| 12-Methyltridecan-3-one ( <b>76</b> )                                         | 1556 | 1558 <sup>[d]</sup> | ms, ri | xx  | xxx | xx  |
| 12-Methyltridecan-2-one ( <b>61</b> )                                         | 1562 | 1565 <sup>[d]</sup> | ms, ri | xxx | xxx | xxx |
| 11-Methyltridecan-2-one ( <b>67</b> )                                         | 1570 | 1572 <sup>[d]</sup> | ms, ri | xxx | xxx | xxx |
| 12-Methyltridecan-2-ol ( <b>24</b> )                                          | 1575 | 1575 <sup>[d]</sup> | ms, ri |     | xx  | xx  |
| (3 <i>E</i> ,5 <i>E</i> )-6,10-dimethylundeca-3,5,9-trien-2-one ( <b>86</b> ) | 1588 | 1589                | ms, ri |     | xx  | xx  |
| <i>N</i> -(2-Phenylethyl)propanamide ( <b>38</b> )                            | 1591 |                     | ms     |     | xx  | xx  |
| Tetradecan-3-one ( <b>71</b> )                                                | 1592 | 1585                | ms, ri |     | xx  | xx  |
| Unknown compound M [226]                                                      | 1611 |                     |        | xx  | xx  |     |
| Unknown compound                                                              | 1613 |                     |        |     | xx  | xx  |
| Unknown compound M [178]                                                      | 1646 |                     |        | xx  |     |     |
| 13-Methyltetradecan-3-one ( <b>77</b> )                                       | 1657 | 1658 <sup>[d]</sup> | ms, ri | xx  | xx  | xx  |
| 13-Methyltetradecan-2-one ( <b>62</b> )                                       | 1663 | 1664 <sup>[d]</sup> | ms, ri | xxx | xxx | xx  |
| 12-Methyltetradecan-3-one ( <b>79</b> )                                       | 1664 | 1670 <sup>[d]</sup> | ms, ri | xx  | xxx |     |
| 2-Pentadecanone ( <b>54</b> )                                                 | 1699 | 1699                | ms, ri |     | xx  | xx  |
| 14-Methylpentadecan-2-one                                                     | 1764 | 1765 <sup>[d]</sup> | ms, ri |     |     | xx  |
| 13-Methylpentadecan-2-one ( <b>68</b> )                                       | 1772 | 1776 <sup>[d]</sup> | ms, ri |     | xx  | xx  |
| Farnesyl acetone ( <b>87</b> )                                                | 1896 | 1895                | ms, ri | xx  | xxx | xxx |

[a]The retention indices are averaged values of the measurements of all used replicates. [b] Retention indices were from NIST Chemistry WebBook or our own database. [c] The compounds were identified by comparison of the mass spectrum to a database spectrum (ms), comparison of the retention index to a published retention index on the same or similar GC fused silica capillary column (ri) or comparison to a synthetic or commercially (syn) available reference compound. [d] GC retention indices were calculated according to an empirical method developed by Schulz et al.<sup>[S2]</sup> exp = experimental. lit = literature, Rep = Replicate. a1/a2, b1/2, c1/c2 = isomers. The amounts of the compounds are given as 0–2 % (x), 2–20 % (xx), 20–100 % (xxx) relative to the largest peak area in the total ion chromatogram.

**Table S6.** VOCs identified in the headspace extracts of *Litoreibacter* sp. A01A-347.

| Compound                                 | RI (exp) <sup>[a]</sup> | RI (lit) <sup>[b]</sup> | Identification <sup>[c]</sup> | Rep 1 | Rep 2 | Rep 3 |
|------------------------------------------|-------------------------|-------------------------|-------------------------------|-------|-------|-------|
| 4-Methylpentan-2-one                     | 757                     | 762 <sup>[d]</sup>      | ms, ri                        | xx    |       |       |
| 5-Methylhexan-2-one ( <b>55</b> )        | 854                     | 862 <sup>[d]</sup>      | ms, ri                        | xx    |       | xx    |
| Hexane-2,5-dione ( <b>93</b> )           | 938                     | 931                     | ms, ri                        | xx    | xx    |       |
| 6-Methylheptan-2-one ( <b>56</b> )       | 957                     | 963 <sup>[d]</sup>      | ms, ri                        |       |       | xx    |
| 4-Cyanocyclohexene ( <b>52</b> )         | 1018                    | 1028                    | ms, ri, syn                   | xxx   |       | xx    |
| 1-Phenylpropan-2-one ( <b>9</b> )        | 1130                    | 1124                    | ms, ri                        | xxx   | xxx   | xxx   |
| ( <i>E</i> )-3-Nonen-2-one ( <b>83</b> ) | 1141                    | 1140                    | ms, ri, syn                   | xxx   | xx    | xxx   |

|                                                               |      |      |             |    |    |     |
|---------------------------------------------------------------|------|------|-------------|----|----|-----|
| Nonane-2,4-dione ( <b>94</b> )                                | 1176 | 1177 | ms, ri, syn | xx | xx | xx  |
| 1-Phenylbutan-2-one ( <b>10</b> )                             | 1228 | 1227 | ms, ri, syn | xx | xx | xx  |
| Unknown compound M [168]                                      | 1288 |      |             |    | xx | xx  |
| Unknown compound M [168]                                      | 1293 |      |             |    | xx | xx  |
| Unknown compound M [182]                                      | 1311 |      |             |    | xx | xxx |
| Unknown compound M [166] d1                                   | 1394 |      |             | xx | xx | xx  |
| (3 <i>E</i> ,5 <i>E</i> )-Undeca-3,5-dien-2-one ( <b>84</b> ) | 1402 | 1402 | ms, ri, syn |    | xx | xx  |
| 1-Phenylhexan-2-one                                           | 1411 | 1412 | ms, ri, syn | xx |    |     |
| Unknown compound M [166] d2                                   | 1434 |      |             |    | xx | xx  |
| 1-Phenylhexan-1-one ( <b>13</b> )                             | 1463 | 1460 | ms, ri      | xx | x  | xx  |
| Unknown compound M [196]                                      | 1473 |      |             |    |    | xxx |
| Unknown compound M [222] e1                                   | 1507 |      |             |    | xx | xx  |
| Unknown compound M [198]                                      | 1511 |      |             | xx | xx | xx  |
| Unknown compound M [210]                                      | 1513 |      |             |    | xx | xxx |
| Unknown compound M [210]                                      | 1520 |      |             | xx | xx | xx  |
| Unknown compound M [222] e2                                   | 1524 |      |             |    | xx | xx  |
| Unknown compound                                              | 1558 |      |             |    | xx | xx  |
| Unknown compound M [210]                                      | 1582 |      |             | xx | xx | xxx |
| Unknown compound M [208] f1                                   | 1595 |      |             |    | xx | xx  |
| Unknown compound M [222] e3                                   | 1604 |      |             | xx |    |     |
| Unknown compound M [208] f2                                   | 1641 |      |             |    | xx | xx  |
| Unknown compound M [220] g1                                   | 1646 |      |             |    | xx | xx  |
| Unknown compound M [220] g2                                   | 1679 |      |             |    | xx | xx  |

[a]The retention indices are averaged values of the measurements of all used replicates. [b] Retention indices were from NIST Chemistry WebBook or our own database. [c] The compounds were identified by comparison of the mass spectrum to a database spectrum (ms), comparison of the retention index to a published retention index on the same or similar GC fused silica capillary column (ri) or comparison to a synthetic or commercially (syn) available reference compound. [d] GC retention indices were calculated according to an empirical method developed by Schulz et al.<sup>[S2]</sup> exp = experimental. lit = literature, Rep = replicate, d1/d2, e1/e2/e3, f1/f2, g1/g2 = isomers. The amounts of the compounds are given as 0–2 % (x), 2–20 % (xx), 20–100 % (xxx) relative to the largest peak area in the total ion chromatogram.

*Spingopyxis litoris* A01A-101

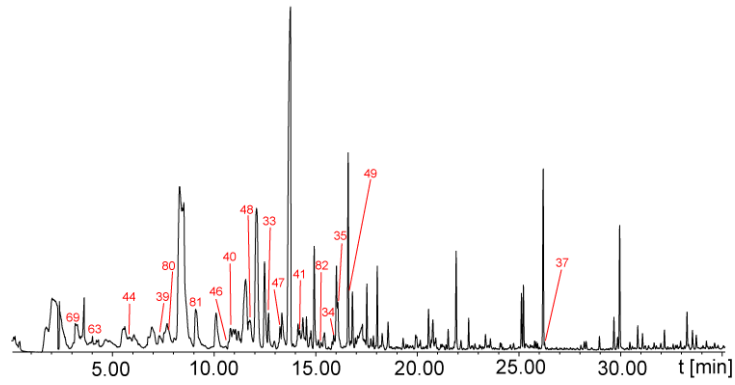

*Algihabitans albus* A01A-324

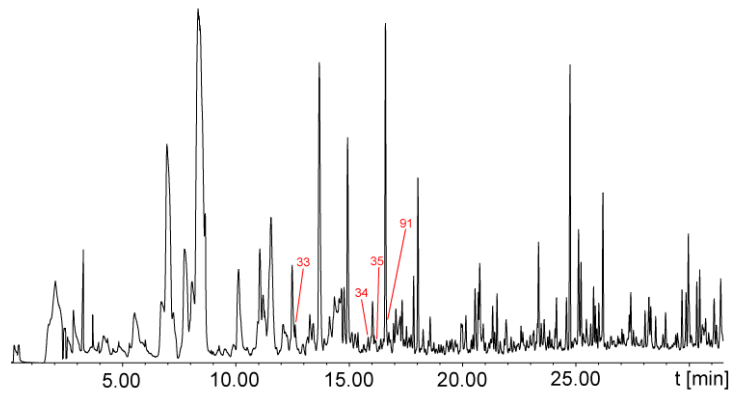

*Coraliitalea coralii* A01A-333

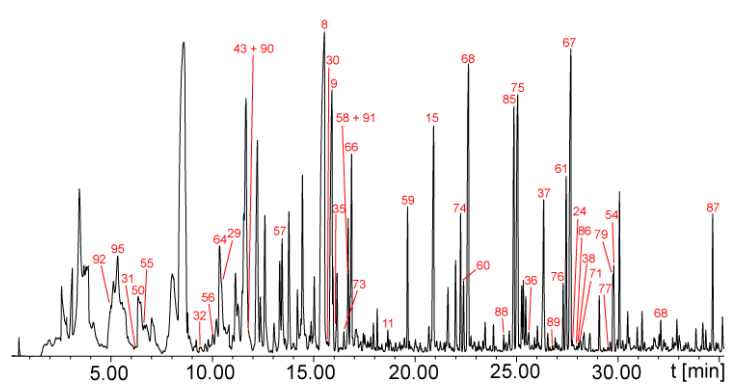

*Litoreibacter* sp. A01A-347

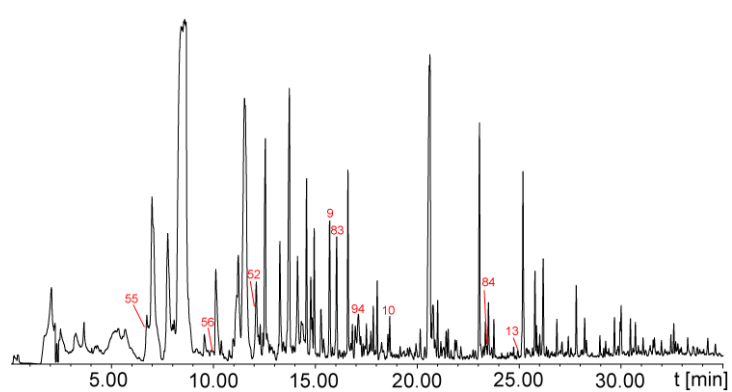

**Figure S1.** Total ion chromatograms of the headspace analyses of the investigated bacteria in this study. The numbers in the chromatograms refer to the identified compounds from the Tables S3-S6 and the main text.



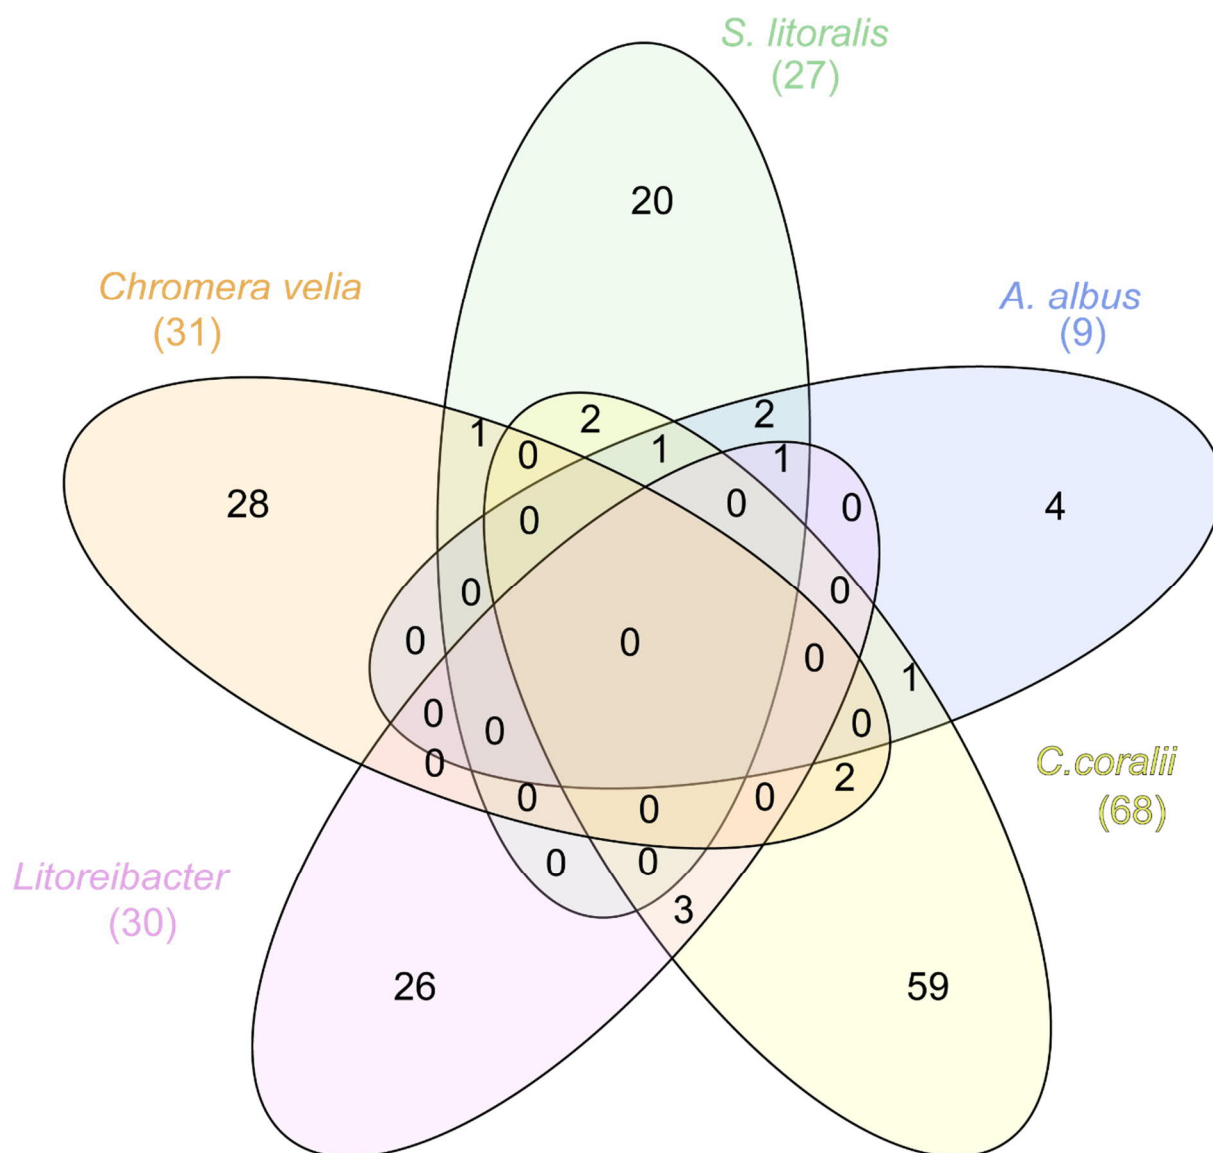

**Figure S2.** Venn diagram of the of the compounds listed in Table 1 and Tables S3-S6. The diagram shows the low overlap in compounds produced between *Chromera velia* and the bacteria and within the bacteria.

## Experimental procedures

**General experimental procedures:** The chemicals were purchased from Sigma Aldrich (Germany), TCI (Germany) or from abcr GmbH (Germany) and used without further purification. The solvents were purified by distillation and dried according to the usual standard laboratory methods. Reactions with air- and moisture-sensitive compounds were carried out in vacuum-heated flasks under a nitrogen atmosphere. Solutions at 0 °C were obtained with an ice-water bath. Thin-layer chromatography (TLC) was carried out on silica gel coated films of the type Polygram® SIL G/UV254 (Macherey-Nagel, layer thickness 0.2 mm). In addition to UV detection (254 nm), common staining reagents such as molybdophosphoric acid or potassium permanganate were used. Flash column chromatography was carried out on silica gel 60 Å (grain size 35 – 70 µm) from Fisher Scientific. The NMR spectra were recorded with the models Avance II 300 (300 MHz for <sup>1</sup>H, 75 MHz for <sup>13</sup>C) and Avance III 400 (400 MHz for <sup>1</sup>H, 100 MHz for <sup>13</sup>C) from Bruker at room temperature. Tetramethylsilane served as the internal standard. The chemical shifts are given in ppm relative to tetramethylsilane as standard. The coupling constants *J* are given in Hertz (Hz).

### Algal culture

The non-axenic alga *Chromera velia* CCAP1602/1 was obtained from the Culture Collection of Algae and Protozoa (CCAP) at the SAMS Limited Scottish Marine Institute (Oban, Argyll, Scotland, UK; [www.ccap.ac.uk](http://www.ccap.ac.uk)). For maintenance and isolation of the heterotrophic bacteria the chromerid alga was grown in enriched seawater medium L1 (as indicated by the CCAP; <https://www.ccap.ac.uk>) with a vitamin mix (thiamine [B<sub>1</sub>], cobalamin [B<sub>12</sub>], biotin [B<sub>7</sub>]) at daylight and room temperature using vented tissue culture flasks (Thermo Fisher Scientific 178905).

**Isolation of bacteria from *Chromera velia* CCAP1602/1:** Bacteria associated with CCAP1602/1 were isolated from the algal culture as described.<sup>[S4]</sup> In brief, 1 ml of the algal culture was centrifuged at 12.000 x g for 10 s. The supernatant was removed and the cell pellet was resuspended in 100 µl of L1 medium and shortly vortexed. The cell suspension was diluted 10<sup>-3</sup> and 2 x 10<sup>-4</sup> in L1 medium and 200 µl of each dilution were spread onto agar plates (140 x 140 mm) containing the following media: (I) MA [marine broth (BD Difco 2216, Michigan) amended with 1.5% (w/v) agar (BD 214010, France); (II) L1-PY [L1 medium amended with 0.05% (w/v) peptone (BD 211677, France), 0.01% (w/v) yeast extract (BD 212750, France) and 1.5% (w/v) agar]; (III) L1-LNHM (L1 medium amended with 0.0001% (w/v) NH<sub>4</sub>Cl, 0.001% (w/v) D-glucose, D-ribose, sodium succinate, sodium pyruvate, glycerol, *N*-acetylglucosamine and 0.002 % (v/v) ethanol according to the low nutrient heterotrophic medium LNHM<sup>[S5]</sup> and 1.5% (w/v) agar]. The plates were incubated in the dark at 20° for 4 to 12 weeks. Bacterial colonies representing different colony morphotypes were picked using a stereomicroscope. The isolates were passaged on the respective agar media (see above), until pure cultures were obtained. Isolated strains were preserved with the Microbank™ System (PL.170, Pro-Lab Diagnostics, U.K.) at -80 °C.

**Identification of the bacterial isolates:** Bacterial isolates were identified by partial 16S rRNA gene sequencing. Therefore, the genomic DNA of the isolates was prepared with the DNeasy Blood & Tissue Kit (69504 Qiagen, Germany) according to the manufacturer's protocol for Gram positive bacteria. PCR-amplification of 16S rRNA genes from the genomic DNA of the bacteria was done in 1 x Phusion Green HF buffer containing each deoxynucleoside triphosphate at a concentration of 200 µM, 0.5 µM of the primers 27f 5'-GAGTTTGATCCTGGCTCAG-3' and 1525r 5'-AGAAAGGAGGTGATCCAGCC-3'),<sup>[S6]</sup> as well as 0.5 µl of the Phusion Hot Start II High Fidelity DNA Polymerase (F-537, Thermo Fisher Scientific, USA). The reactions were adjusted to a final volume of 50 µl with nuclease free water (R0581, Thermo Fisher Scientific). The thermal cycling steps were: (I) initial denaturing at 98 °C for 30 s; (II) 31 cycles of denaturing at 98 °C for 10s, annealing at 57 °C for 10 s and extension at 72 °C for 45 s followed by (III) a final extension at 72°C for 3 min. Purified PCR-amplificates were Sanger-sequenced with the primers 27f, 1525r, 519r (5'-G(T/A)ATTACCGCGGC(T/G)GCTG-3') and 803f (5'-ATTAGATACCCTGGTAG-3')<sup>[S6]</sup>

by the DNA sequencing services of the LGC genomics GmbH (Berlin, Germany). The bacterial isolates were identified by comparison of their 16S rRNA gene sequences to publicly available 16S rRNA gene reference data bases, i.e. the EzBioCloud "Identify" Service<sup>[S7]</sup> (<https://www.ezbiocloud.net/identify>) and the NCBI Blastn suite using the megablast algorithm against the non-redundant nucleotide collection (nr/nt) and the database of 16S ribosomal sequences of Bacteria and Archaea ([https://blast.ncbi.nlm.nih.gov/Blast.cgi?PROGRAM=blastn&PAGE\\_TYPE=BlastSearch&LINK\\_LOC=blasthome](https://blast.ncbi.nlm.nih.gov/Blast.cgi?PROGRAM=blastn&PAGE_TYPE=BlastSearch&LINK_LOC=blasthome)).

**Strains and cultivation conditions:** All bacterial strains (Table S1) were incubated at 28 °C on Marine Broth agar plates (MB, Carl Roth). 50 mL preparatory primary liquid cultures were obtained with these plated cultures. Liquid cultures for OSSA were inoculated with 1 mL of a preculture in 100 mL fresh MB media in 250 mL Erlenmeyer flasks. All liquid cultures were cultivated at 28 °C in a shaker.

The cultivation conditions of the xenic alga *C. velia* CCAP1602/1 were optimized by the company CellDEG GmbH (Berlin, Germany) with respect to the medium, light regime, temperature and CO<sub>2</sub>-concentration in a series of pre-experiments analogous to former experiments with cyanobacteria.<sup>[S8]</sup> Final high-density cultivation of the alga was conducted by CellDEG in HD100 cultivators on the HDC 9.100 platform with 100 rpm (Sartorius orbital shaker) in 100 mL ¼ HD 4087 medium (N, 16 mM; K, 5 mM; P, 1 mM; S, 1.5 mM; Mg, 1.5 mM; Ca, 0.125 mM; Fe-EDTA, 0.03 mM; B, 12.5 µM; Mn, 5 µM, Zn, 1.25 µM; Mo, 0.75 µM; Ni, 0.025 µM; Co, 0.025 µM; Cu, 0.025 µM) comprising the vitamin mix of L1 medium. *C. velia* was cultivated at a temperature of 28 °C with a low light setup (photon flux density: 30 µmol m<sup>-2</sup> s<sup>-1</sup>, light source: Valoya RX400, light spectrum: AP673L) with a day-night regime of 16 hours light and 8 hours darkness. The CO<sub>2</sub>-concentration in the gas supply unit of the HD100 cultivator was constantly 5%. The cultivation was finished after 19 days at an OD of 1.2. The culture was then transferred into 50 mL Falcon tubes.

**GC/MS analyses:** The GC/MS analyses of synthetic samples were performed on an Agilent 8860 gas chromatograph coupled to an Agilent 5977B mass selective detector. The measurements were carried out in a pulsed split mode at the following temperature programme: 50 °C (5 min. isothermal) start temperature, 20 °C/min heating rate, 320 °C (5 min isothermal) final temperature. The analyses of the headspace extracts of the natural samples were performed on an Agilent 7890B gas chromatograph with a 5977A mass selective detector. The measurements were carried out at the following temperature programme: 50 °C (5 min. isothermal) start temperature, 5 °C/min heating rate, 320 °C (10 min isothermal) final temperature. Gas chromatographic separation was performed on fused-silica capillary columns HP-5MS (30 m × 0.25 mm ID × 0.25 µm film, Agilent Technologies). Helium was used as carrier gas with a volume flow of 1.2 mL/min and ionisation was carried out by electron impact ionisation at 70 eV for both instruments. The GC/MS instrument for the headspace analysis was equipped with a thermal desorption unit (TDU 2, Gerstel GmbH & Co.KG, Germany), a PTV inlet with a cooled injection system (CIS 4, Gerstel GmbH & Co.KG, Germany) and a multipurpose sampler (MPS 2 XL, Gerstel GmbH & Co.KG, Germany). The analytes were desorbed from Tenax TA desorption tubes (Gerstel GmbH & Co.KG, Germany) under the following temperature programme: initial temperature: 30 °C (delay time: 0.80 min, initial time: 0.10 min), 60 °C/min heating rate, 280 °C (5 min isothermal) final temperature. The analytes were cryofocussed in the CIS under the following temperature programme: initial temperature: -100 °C (equilibration time: 0.50 min, initial time: 0.01 min), 12 °C/s heating rate, 300 °C (3 min isothermal) final temperature. The analytes were desorbed in a splitless mode and the PTV inlet was in a solvent vent mode (vent flow: 40 mL/min, vent pressure: 7.70 psi until 0.01 min, purge flow to split vent: 50 mL/min at 0.76 min (45 sec. splitless time, method 1) or 50 mL/min at 1.01 min (60 sec. splitless time, method 2). The TDU transfer temperature was set at 300 °C with a fixed transfer temperature mode. The TDU was cooled with a UPC Plus (Gerstel GmbH & Co.KG, Germany) equipped with ethanol and the CIS was cooled with liquid nitrogen. Gas chromatographic retention indices (RI) were determined from a homologous series of n-alkanes (C8–C40). The mass numbers *m/z* are given in amu and the relative intensities in %.

**Collection of headspace volatiles:** Inoculated algal or bacterial liquid cultures (100 mL) of were placed in 250 mL Erlenmeyer flasks and analysed by OSSA at room temperature. The gas phases of the samples were adsorbed on Tenax TA desorption tubes using a pump (MB-21E, Senior Flextronics, USA). The analytes were desorbed by thermodesorption, trapped by cryofocusing and analysed by GC/MS. Three replicates of each bacterial strain were used for the headspace extraction and GC/MS analysis. One replicate of each bacterial strain was analysed with method 1. The other two replicates were analysed with method 2. Headspace extraction and GC/MS analysis were executed for two replicates of the algal strain with method 1.

## Synthetic procedures

### 3,4,4-Trimethylcyclopent-2-en-1-one (1)

According to the published procedure of Vacas et al.<sup>[S9]</sup>, polyphosphoric acid (25.0 g) was heated to 95 °C and isobutyl (*E*)-but-2-enoate (**97**, 5.00 g, 5.60 mL, 32.5 mmol, 1.00 eq.) was added over 4 h under an atmosphere of nitrogen. The reaction mixture was stirred for 3 h at 95 °C, cooled to room temperature and poured into water (50 mL) while stirring. The layers were separated and the aqueous layer was extracted three times with diethyl ether. The combined organic layers were successively washed with sat. NaHCO<sub>3</sub> and brine, dried over MgSO<sub>4</sub> and the solvent was removed under reduced pressure. The crude product was purified by column chromatography on silica gel [pentane/Et<sub>2</sub>O (10:1)] to give the product **1** (845 mg, 6.82 mmol, 21%) as a clear, colourless oil.

*R*<sub>f</sub>: 0.04 (pentane/Et<sub>2</sub>O 10:1); *R*<sub>i</sub>: 1050; <sup>1</sup>H-NMR (400 MHz, CDCl<sub>3</sub>): δ = 5.81 (q, *J* = 1.4 Hz, 1 H), 2.31 (s, 2 H), 2.05–2.03 (m, 3 H), 1.22 (s, 6 H) ppm; <sup>13</sup>C-NMR (100 MHz, CDCl<sub>3</sub>): δ = 207.8 (C=O), 185.6 (Cq), 129.3 (CH), 51.5 (CH<sub>2</sub>), 42.9 (Cq), 26.7 (2 x CH<sub>3</sub>), 14.1 (CH<sub>3</sub>) ppm; MS (EI, 70 eV): *m/z* (%) = 124 (35) [M]<sup>+</sup>, 110 (8), 109 (100), 82 (6), 81 (34), 79 (17), 53 (7), 41 (8), 40 (4), 39 (10).

### 2-Hydroxy-2,6,6-trimethylcyclohexan-1-one (2)

A solution of *m*CPBA (77%, 587 mg, 2.62 mmol, 2.00 eq.) in CHCl<sub>3</sub> (7.0 mL) was slowly added to a solution of freshly distilled β-cyclocitral (**98**, 200 mg, 0.21 mL, 1.31 mmol, 1.00 eq.) in CHCl<sub>3</sub> (0.7 mL) at reflux under an atmosphere of nitrogen. The solution was stirred for 6 h at reflux temperature, then cooled to room temperature and successively washed with aq. NaHSO<sub>3</sub> solution, 10% aq. NaOH solution and H<sub>2</sub>O. The solvent was removed under reduced pressure and the resulting oil was hydrolysed with a 1% methanolic NaOH solution at room temperature for 2 h and then heated to reflux for 1.5 h. Methanol was evaporated under reduced pressure, the crude product was dissolved in CHCl<sub>3</sub>, washed with brine and dried over MgSO<sub>4</sub>. Purification by column chromatography on silica gel [pentane/diethyl ether (10:1)] gave the product **2** (162 mg, 1.04 mmol, 79%) as a clear, slightly yellow oil.<sup>[S10]</sup>

*R*<sub>f</sub>: 0.25 (pentane/Et<sub>2</sub>O 10:1); *R*<sub>i</sub>: 1109; <sup>1</sup>H-NMR (300 MHz, CDCl<sub>3</sub>): δ = 3.92 (br.s, 1 H), 2.14–2.05 (m, 1 H), 1.92–1.55 (m, 5 H), 1.41 (s, 3 H), 1.22 (s, 3 H), 1.15 (s, 3 H) ppm; <sup>13</sup>C-NMR (75 MHz, CDCl<sub>3</sub>): δ = 218.8 (C=O), 75.9 (Cq), 44.3 (Cq), 40.7 (2 x CH<sub>2</sub>), 27.3 (CH<sub>3</sub>), 27.2 (CH<sub>3</sub>), 25.7 (CH<sub>3</sub>), 18.9 (CH<sub>2</sub>) ppm; MS (EI, 70 eV): *m/z* (%) = 156 (3) [M]<sup>+</sup>, 128 (42), 110 (42), 95 (61), 85 (22), 84 (18), 71 (100), 58 (35), 55 (15), 43 (40), 41 (15).

### 7,9,9-Trimethyl-1,4-dioxaspiro[4.5]dec-7-ene (100)

As described by Babler et al.<sup>[S11]</sup>, a solution of α-isophorone (**99**, 2.76 g, 3.00 mL, 20.0 mmol, 1.00 eq.), glycol (3.72 g, 3.40 mL, 60.0 mmol, 3.00 eq.) and *p*-toluenesulfonic acid monohydrate (114 mg, 3.00 mol%) in toluene (50 mL) was refluxed for 7 h while removing water and glycol with a Dean-Stark trap and then stirred at room temperature for 15 h. The reaction was quenched with sat. NaHCO<sub>3</sub>, the layers were separated and the aqueous layer was extracted three times with ethyl acetate. The combined organic layers were washed with brine, dried over

MgSO<sub>4</sub> and the solvent was removed under reduced pressure. The crude product was purified by column chromatography on silica gel [pentane/EtOAc (80:1)] to give the product **100** (2.34 g, 12.8 mmol, 64%) as a clear, colourless oil.

R<sub>f</sub>: 0.26 (pentane/EtOAc 80:1); <sup>1</sup>H-NMR (300 MHz, CDCl<sub>3</sub>): δ = 5.19–5.14 (m, 1 H), 3.97–3.94 (m, 4 H), 2.16–2.12 (m, 2 H), 1.69–1.66 (m, 3 H), 1.62–1.59 (m, 2 H), 1.05 (s, 6 H) ppm; <sup>13</sup>C-NMR (75 MHz, CDCl<sub>3</sub>): δ = 131.3 (CH), 128.0 (Cq), 109.2 (Cq), 64.1 (2 x CH<sub>2</sub>), 43.6 (CH<sub>2</sub>), 39.8 (CH<sub>2</sub>), 34.2 (Cq), 30.4 (2 x CH<sub>3</sub>), 23.4 (CH<sub>3</sub>) ppm; MS (EI, 70 eV): *m/z* (%) = 182 (38) [M]<sup>+</sup>, 167 (23), 96 (51), 95 (15), 87 (31), 86 (100), 81 (33), 79 (12), 67 (11), 41 (12).

### 3,5,5-Trimethylcyclohex-3-en-1-one (**101**)

The β-ketal **100** (498 mg, 2.73 mmol, 1.00 eq.) was dissolved in acetic acid and water (4:1; 13.7 mL) and stirred at room temperature for 4 h. The reaction mixture was then carefully poured into a cold NaHCO<sub>3</sub> solution (205 mL) and diluted with brine (137 mL). The aqueous layer was extracted three times with diethyl ether, the combined organic layers were dried over MgSO<sub>4</sub> and the solvent was removed under reduced pressure. A product mixture of **101** and α-isophorone (**99**, 356 mg, 2.58 mmol, 95%) was obtained as a clear, slightly yellow oil in the ratio of 5:1 as determined by NMR-analysis.<sup>[S11]</sup>

<sup>1</sup>H-NMR (300 MHz, CDCl<sub>3</sub>): δ = 5.46–5.39 (m, 1 H), 2.74–2.70 (m, 2 H), 2.32 (s, 2 H), 1.71 (dt, *J* = 1.5, 0.9 Hz, 3 H), 1.04 (s, 6 H) ppm; <sup>13</sup>C-NMR (75 MHz, CDCl<sub>3</sub>): δ = 210.5 (C=O), 132.5 (CH), 129.0 (Cq), 53.2 (CH<sub>2</sub>), 43.7 (CH<sub>2</sub>), 36.4 (Cq), 29.6 (2 x CH<sub>3</sub>), 22.6 (CH<sub>3</sub>) ppm; MS (EI, 70 eV): *m/z* (%) = 138 (59) [M]<sup>+</sup>, 123 (58), 96 (89), 95 (87), 81 (100), 79 (27), 67 (40), 53 (20), 41 (30), 39 (34).

### 3,5,5-Trimethylcyclohex-3-en-1-ol

According to the published procedure of Rossini et al.<sup>[S12]</sup>, a solution of β-isophorone (**101**, 314 mg, 2.27 mmol, 1.00 eq.) in dry diethyl ether (1.0 mL) was slowly added to LiAlH<sub>4</sub> (57.3 mg, 1.51 mmol, 0.67 eq.) in dry diethyl ether (3.6 mL) under an atmosphere of nitrogen. The mixture was refluxed for 1 h, cooled to 0 °C and then water and 5% HCl solution were added successively. The organic layer was washed five times with brine, dried over MgSO<sub>4</sub> and the solvent was removed under reduced pressure. A product mixture of 3,5,5-trimethylcyclohex-3-en-1-ol and the isomer 3,5,5-trimethylcyclohex-2-en-1-ol (266 mg, 1.89 mmol, 84%) was obtained as a clear, colourless oil in the ratio of 5:1 as determined by NMR-analysis.

R<sub>f</sub>: 1064; <sup>1</sup>H-NMR (300 MHz, CDCl<sub>3</sub>): δ = 5.12–5.08 (m, 1 H), 3.99 (dddd, *J* = 11.6, 9.4, 5.6, 3.7 Hz, 1 H), 2.27–2.16 (m, 1 H), 1.92–1.66 (m, 3 H), 1.66–1.64 (m, 3 H), 1.54 (br. s, 1 H), 1.00 (s, 3 H), 0.98 (s, 3 H) ppm; <sup>13</sup>C-NMR (75 MHz, CDCl<sub>3</sub>): δ = 131.7 (CH), 128.6 (Cq), 66.3 (CH), 46.1 (CH<sub>2</sub>), 39.8 (CH<sub>2</sub>), 34.1 (Cq), 31.4 (CH<sub>3</sub>), 29.5 (CH<sub>3</sub>), 23.3 (CH<sub>3</sub>) ppm; MS (EI, 70 eV): *m/z* (%) = 140 (11) [M]<sup>+</sup>, 125 (18), 122 (14), 107 (100), 96 (14), 91 (18), 81 (26), 79 (19), 55 (21), 41 (18), 39 (14).

### 3,5,5-Trimethylcyclohex-3-en-1-yl acetate (**5**)

A solution of the alcohol mixture of 3,5,5-trimethylcyclohex-3-en-1-ol and 3,5,5-trimethylcyclohex-2-en-1-ol (50.3 mg, 0.36 mmol, 1.00 eq.), TMEDA (41.8 mg, 50.0 μL, 0.36 mmol, 1.00 eq.) and acetic anhydride (73.5 mg, 70.0 μL, 0.72 mmol, 2.00 eq.) was stirred for 50 min at room temperature. The reaction was quenched by the addition of water, the aqueous layer was extracted three times with diethyl ether and the combined organic layers were dried over MgSO<sub>4</sub>. Purification by column chromatography on silica gel [pentane/diethyl ether (10:1)] gave a product mixture of **5** and the isomer 3,5,5-trimethylcyclohex-2-en-1-yl acetate (49.0 mg, 0.27 mmol, 75%) in the ratio of 5:1 as determined by GC/MS analysis as a clear, colourless oil.<sup>[S13]</sup>

$R_f$ : 0.12 (pentane/Et<sub>2</sub>O 10:1);  $R_f$ : 1192; <sup>1</sup>H-NMR (400 MHz, CDCl<sub>3</sub>):  $\delta$  = 5.14–5.11 (m, 1 H), 5.06 (dddd,  $J$  = 11.6, 9.4, 5.8, 3.7 Hz, 1 H), 2.31–2.24 (m, 1 H), 2.17 (s, 3 H), 2.04 (s, 3 H), 1.93 (dddd,  $J$  = 16.5, 9.2, 2.4, 1.2 Hz, 1 H), 1.76–1.67 (m, 2 H), 1.01 (s, 6 H) ppm; <sup>13</sup>C-NMR (100 MHz, CDCl<sub>3</sub>):  $\delta$  = 170.8 (C=O), 131.7 (CH), 128.2 (Cq), 69.4 (CH), 41.8 (CH<sub>2</sub>), 35.8 (CH<sub>2</sub>), 33.7 (Cq), 31.1 (CH<sub>3</sub>), 29.4 (CH<sub>3</sub>), 23.2 (CH<sub>3</sub>), 21.5 (CH<sub>3</sub>) ppm; MS (EI, 70 eV):  $m/z$  (%) = 182 (missing) [M]<sup>+</sup>, 123 (4), 122 (28), 108 (9), 107 (100), 105 (7), 91 (16), 81 (4), 79 (5), 43 (9), 41 (3).

### 5-Hydroxy-3,4-dimethylfuran-2(5*H*)-one (103)

Under an atmosphere of nitrogen, LiAlH<sub>4</sub> (331 mg, 8.72 mmol, 1.10 eq.) was suspended in dry THF (16 mL) and a solution of *t*-butanol (1.93 mg, 26.2 mmol, 3.30 eq.) in dry diethyl ether (8.0 mL) was added. This suspension was added dropwise over 30 min to a solution of 3,4-dimethylfuran-2,5-dione (**102**, 1.00 g, 7.93 mmol, 1.00 eq.) in dry diethyl ether (30 mL) at -10 °C and stirred for 1 h at this temperature. The solution was warmed to room temperature and stirred for 19 h, then cooled to 0 °C and quenched with 2 M H<sub>2</sub>SO<sub>4</sub> (30 mL). The aqueous layer was extracted three times with diethyl ether and the combined organic layers were dried over Na<sub>2</sub>SO<sub>4</sub>. The crude product was purified by column chromatography on silica gel [pentane/EtOAc (5:1)] to give the product **103** (684 mg, 5.33 mmol, 67%) as a white solid.<sup>[S14]</sup>

$R_f$ : 0.06 (pentane/EtOAc 5:1); <sup>1</sup>H-NMR (300 MHz, CDCl<sub>3</sub>):  $\delta$  = 5.91 (d,  $J$  = 4.6 Hz, 1 H), 5.21 (br. s, 1 H), 2.04–1.97 (m, 3 H), 1.84–1.78 (m, 3 H) ppm; <sup>13</sup>C-NMR (75 MHz, CDCl<sub>3</sub>):  $\delta$  = 173.5 (C=O), 156.5 (Cq), 125.8 (Cq), 98.7 (CH), 11.4 (CH<sub>3</sub>), 8.3 (CH<sub>3</sub>) ppm.

### 3,4-Dimethyl-5-pentylfuran-2(5*H*)-one (27)

According to a procedure of Surmont et al.<sup>[S15]</sup>, pentylmagnesium bromide (2 M in Et<sub>2</sub>O, 0.47 mL, 0.94 mmol, 2.40 eq.) was added to a solution of 5-hydroxy-3,4-dimethylfuran-2(5*H*)-one (**104**, 50.0 mg, 0.39 mmol, 1.00 eq.) in dry and degassed THF (1.7 mL) under an atmosphere of nitrogen. The solution was stirred for 21.5 h at room temperature and quenched with 1 M HCl. The organic layer was extracted with diethyl ether three times and dried over MgSO<sub>4</sub>. The solvent was removed under reduced pressure and the crude product was purified by column chromatography on silica gel [pentane/Et<sub>2</sub>O (5:1)] to give the product **27** (51.2 mg, 0.28 mmol, 72%) as a clear, slightly yellow oil.

$R_f$ : 0.35 (pentane/ Et<sub>2</sub>O 5:1);  $R_f$ : 1525, <sup>1</sup>H-NMR (300 MHz, CDCl<sub>3</sub>):  $\delta$  = 4.78–4.66 (m, 1 H), 1.94 (quin,  $J$  = 1.1 Hz, 3 H), 1.92–1.83 (m, 1 H), 1.81 (dq,  $J$  = 2.1, 1.1 Hz, 3 H), 1.53–1.21 (m, 7 H), 0.95–0.83 (m, 3 H) ppm; <sup>13</sup>C-NMR (75 MHz, CDCl<sub>3</sub>):  $\delta$  = 175.1 (C=O), 159.6 (Cq), 123.8 (Cq), 83.6 (CH), 32.5 (CH<sub>2</sub>), 31.9 (CH<sub>2</sub>), 24.5 (CH<sub>2</sub>), 22.8 (CH<sub>2</sub>), 14.3 (CH<sub>3</sub>), 12.4 (CH<sub>3</sub>), 8.8 (CH<sub>3</sub>) ppm; MS (EI, 70 eV):  $m/z$  (%) = 182 (16) [M]<sup>+</sup>, 153 (8), 126 (11), 112 (27), 111 (46), 99 (5), 84 (8), 83 (100), 55 (24), 43 (8).

### (3*E*,5*E*)-Undeca-3,5-dien-2-one (84)

According to a procedure of Gao et al.<sup>[S16]</sup>, a solution of the phosphonate **104** (693 mg, 0.69 mL, 3.57 mmol, 1.50 eq.) in dry THF (10 mL) was cooled to 0 °C and *n*-BuLi (1.6 M in hexane, 2.20 mL, 3.57 mmol, 1.50 eq.) was slowly added and the solution was stirred for 20 min under an atmosphere of nitrogen. A solution of (*E*)-oct-2-enal (**105**, 300 mg, 0.36 mL, 2.38 mmol, 1.00 eq.) in dry THF (5.0 mL) was slowly added. The reaction mixture was warmed to room temperature, stirred overnight and quenched by the addition of sat. NH<sub>4</sub>Cl solution. The aqueous layer was extracted three times with diethyl ether, the combined organic layers were dried over MgSO<sub>4</sub> and the solvent was removed under reduced pressure. The crude product was purified by column chromatography on silica gel [pentane/diethyl ether (40:1)] to give the ketone **84** (196 mg, 1.17 mmol, 49%) as a clear, colourless liquid.

$R_f$ : 0.24 (pentane/Et<sub>2</sub>O 40:1);  $R_i$ : 1402; <sup>1</sup>H-NMR (300 MHz, CDCl<sub>3</sub>):  $\delta$  = 7.16–7.04 (m, 1 H), 6.22–6.15 (m, 2 H), 6.06 (d,  $J$  = 15.6 Hz, 1 H), 2.26 (s, 3 H), 2.23–2.13 (m, 2 H), 1.53–1.38 (m, 2 H), 1.38–1.21 (m, 4 H), 0.91 (t,  $J$  = 7.0 Hz, 3 H) ppm; <sup>13</sup>C-NMR (75 MHz, CDCl<sub>3</sub>):  $\delta$  = 198.9 (C=O), 145.8 (CH), 144.0 (CH), 128.8 (CH), 128.7 (CH), 33.1 (CH<sub>2</sub>), 31.3 (CH<sub>2</sub>), 28.3 (CH<sub>2</sub>), 27.1 (CH<sub>3</sub>), 22.4 (CH<sub>2</sub>), 14.0 (CH<sub>3</sub>); MS (EI, 70 eV):  $m/z$  (%) = 166 (9) [M]<sup>+</sup>, 97 (5), 96 (9), 95 (100), 81 (24), 79 (5), 67 (8), 53 (4), 43 (16), 41 (5).

## Mass spectra

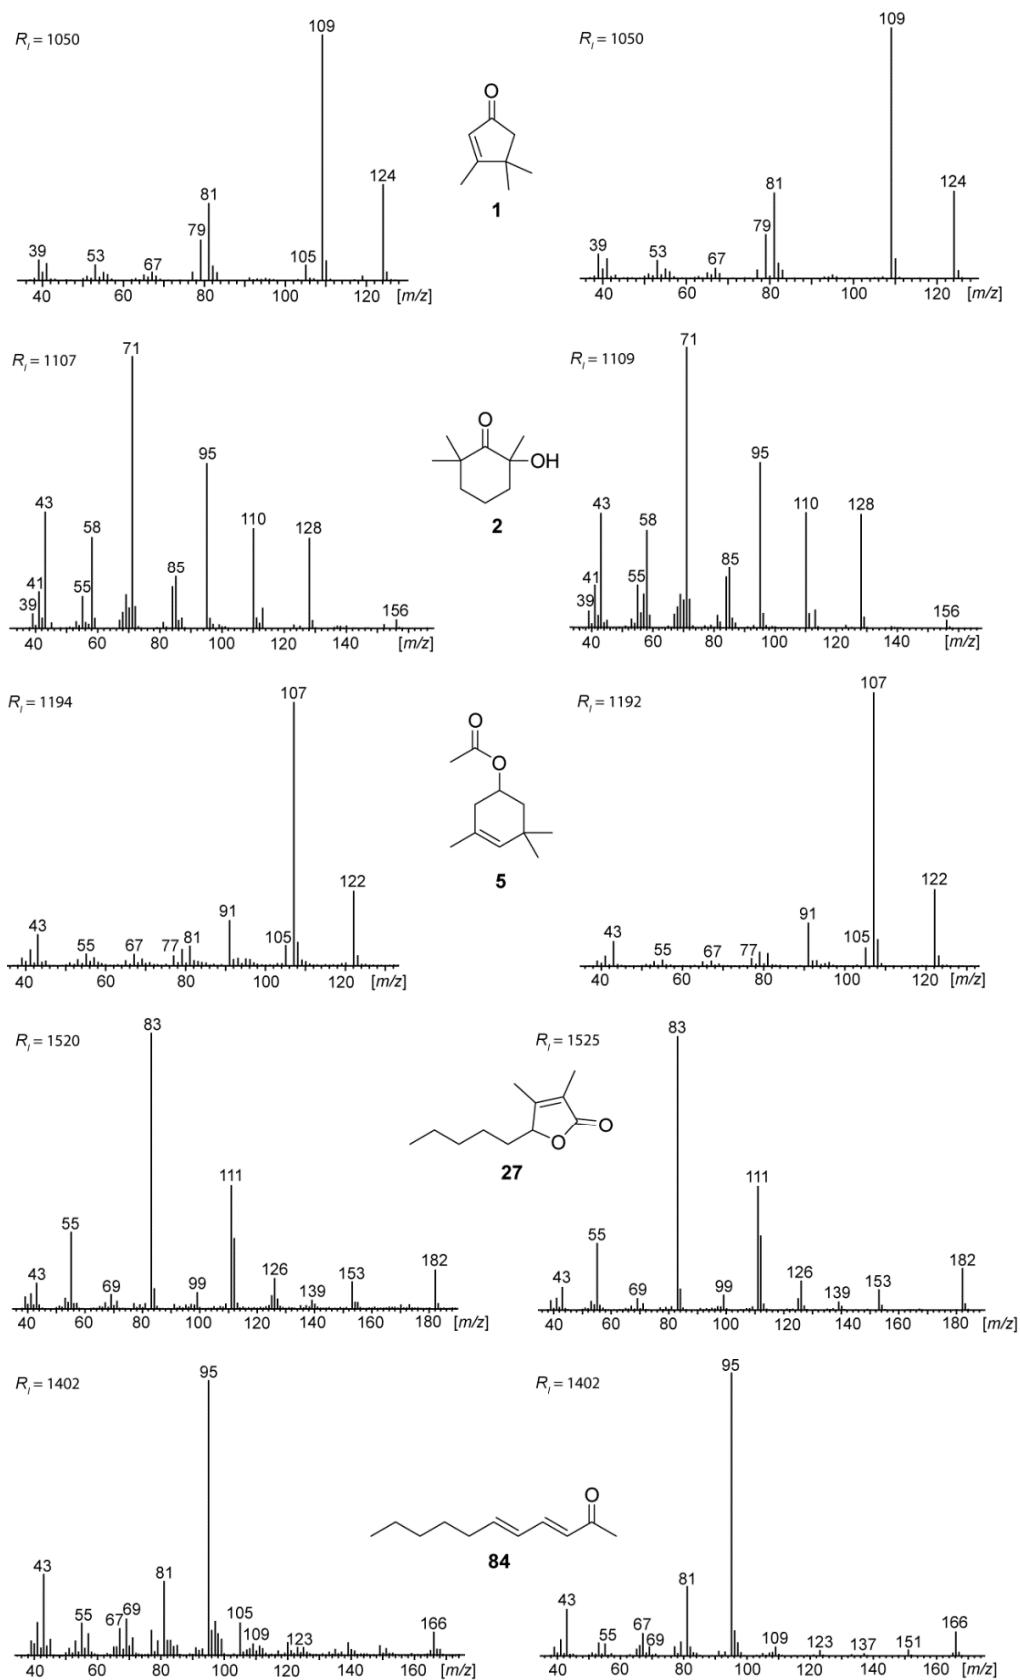

**Figure S3.** Comparison of the mass spectra and linear gas chromatographic retention indices (RI) of the natural(left) and the synthetic compounds (right). Mass spectra will be made publicly available via the open access data base MACE after publication of this article.<sup>[S17]</sup>



## NMR Spectra

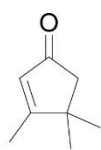

**1**

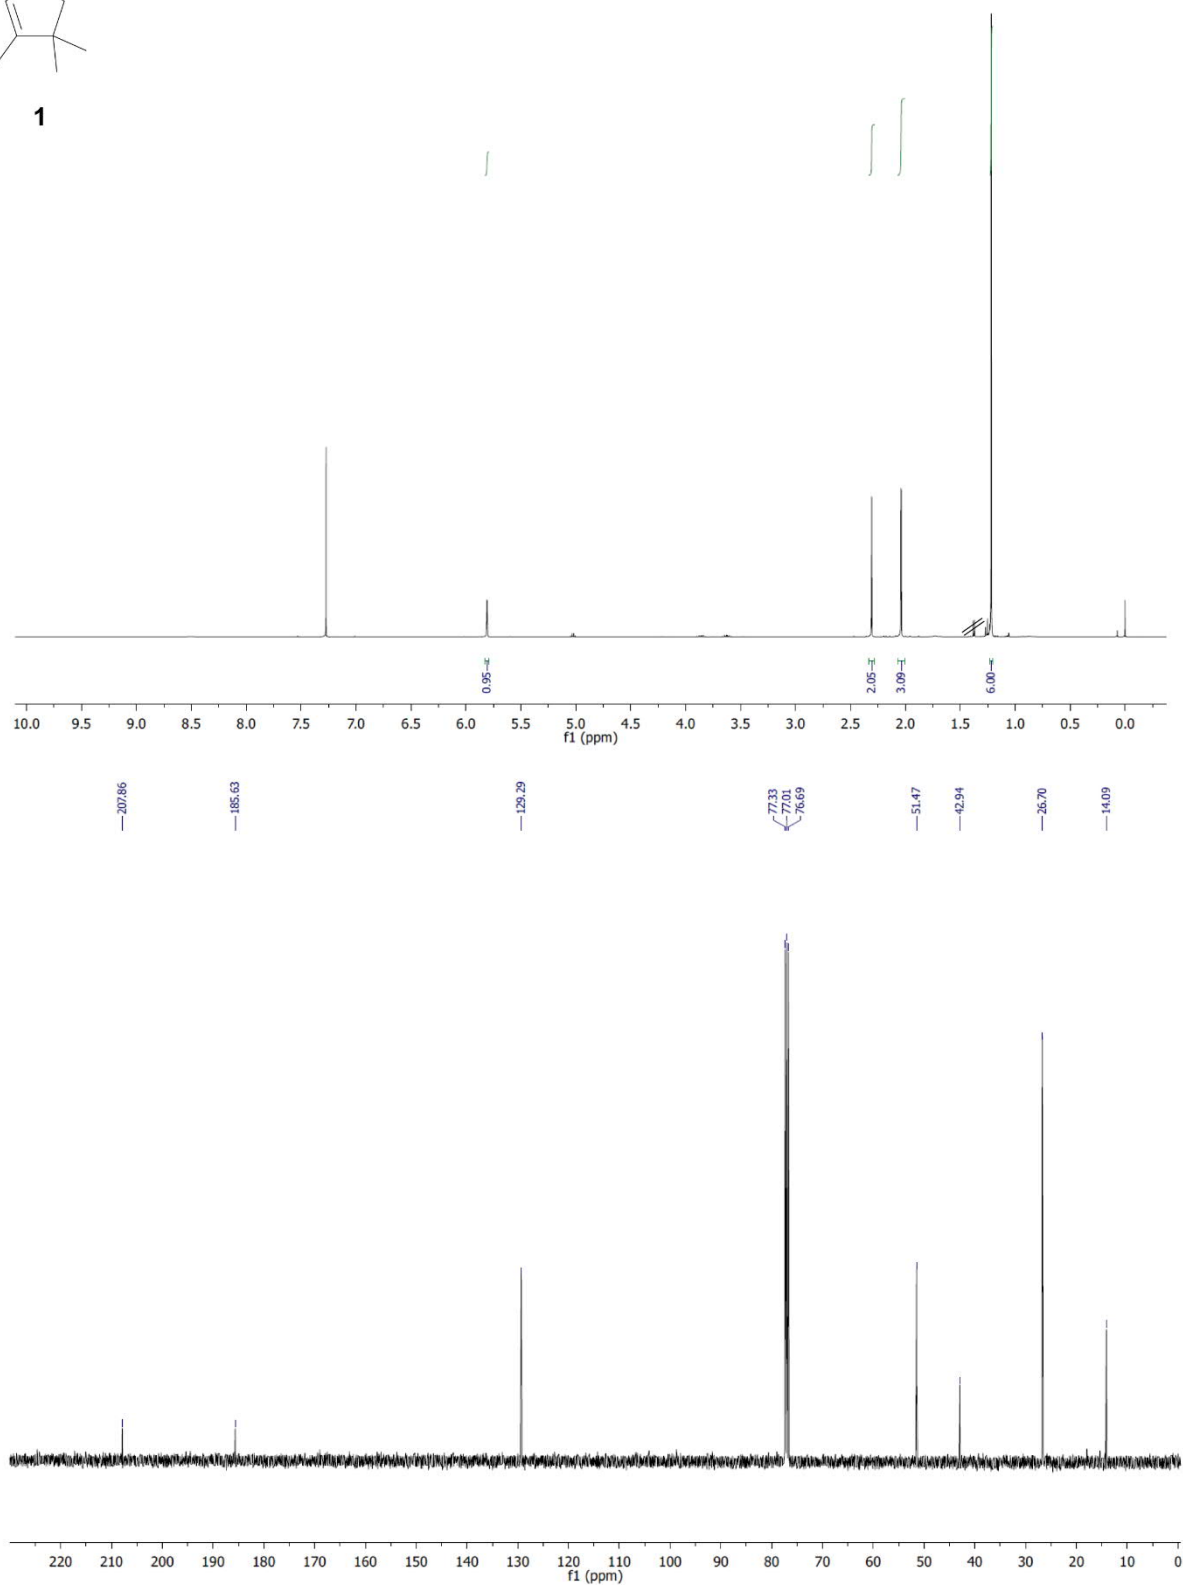

Figure S4. <sup>1</sup>H- and <sup>13</sup>C-NMR of 3,4,4-trimethylcyclopent-2-en-1-one (**1**).

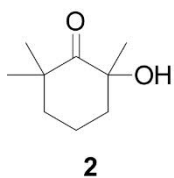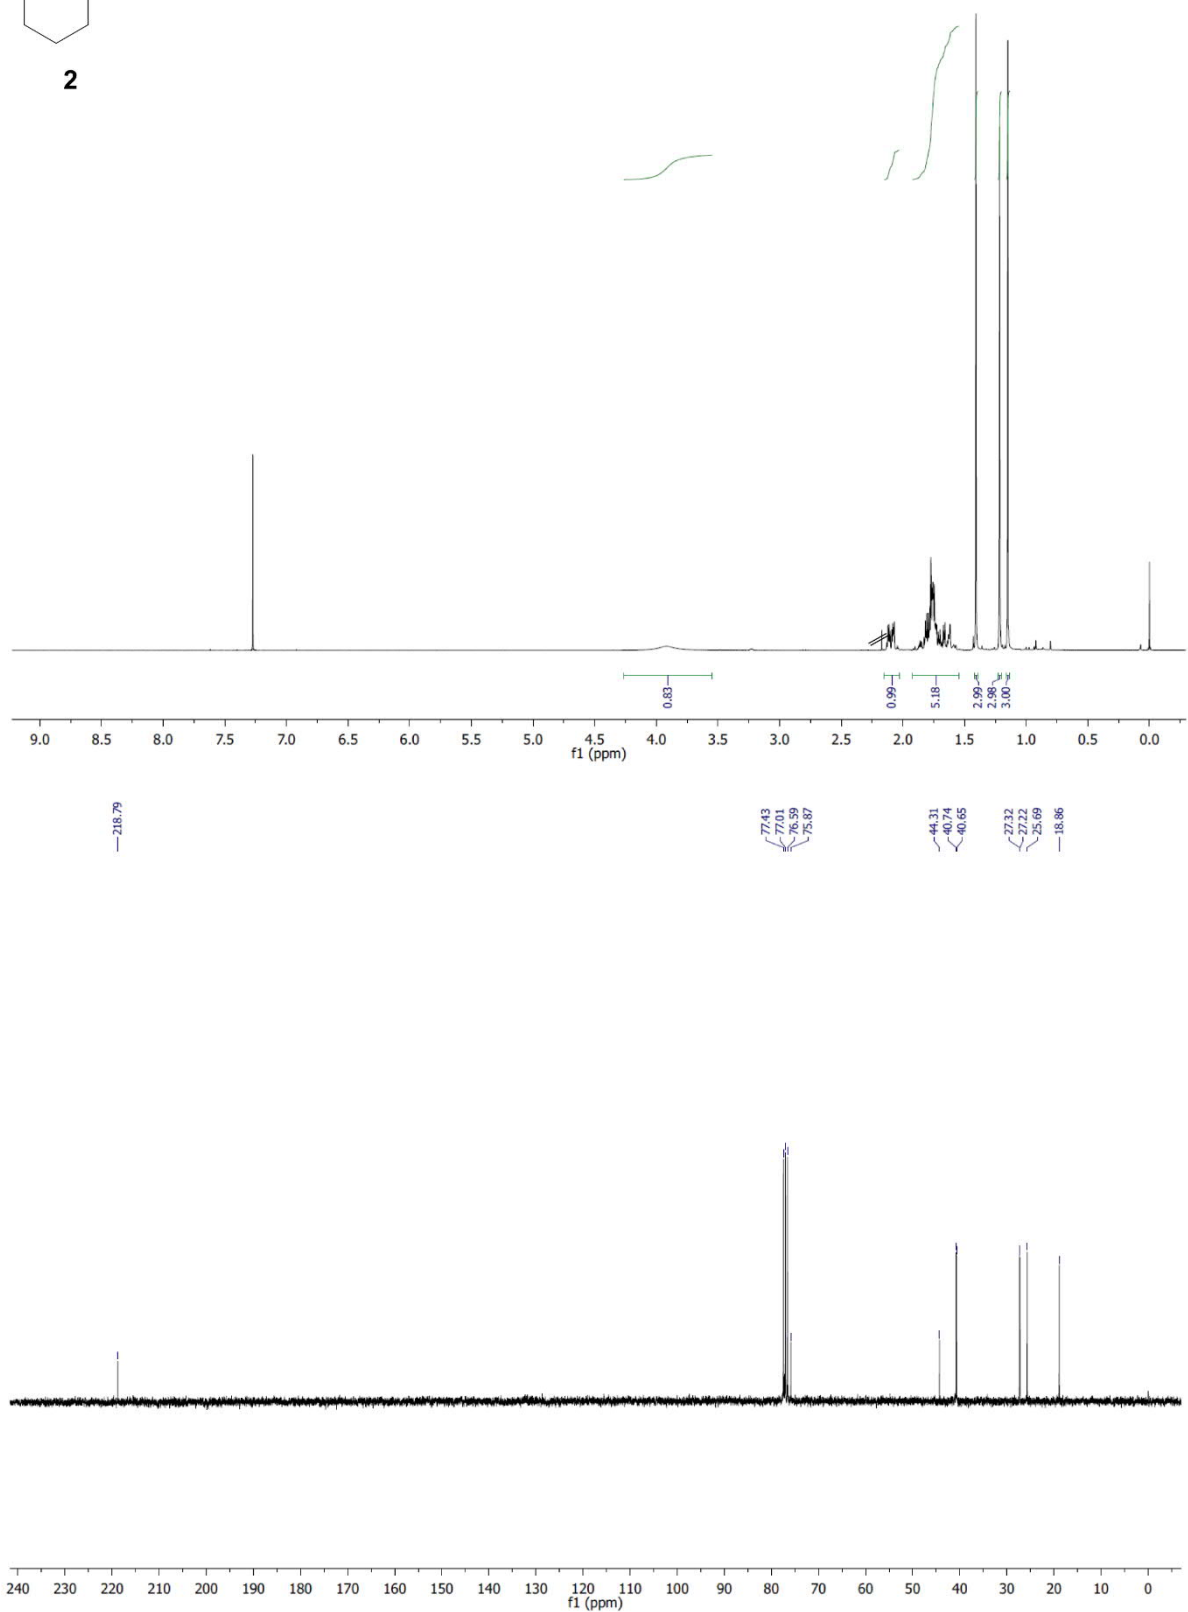

**Figure S5.**  $^1\text{H}$ - and  $^{13}\text{C}$ -NMR of 2-hydroxy-2,6,6-trimethylcyclohexan-1-one (2).

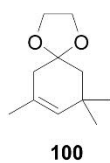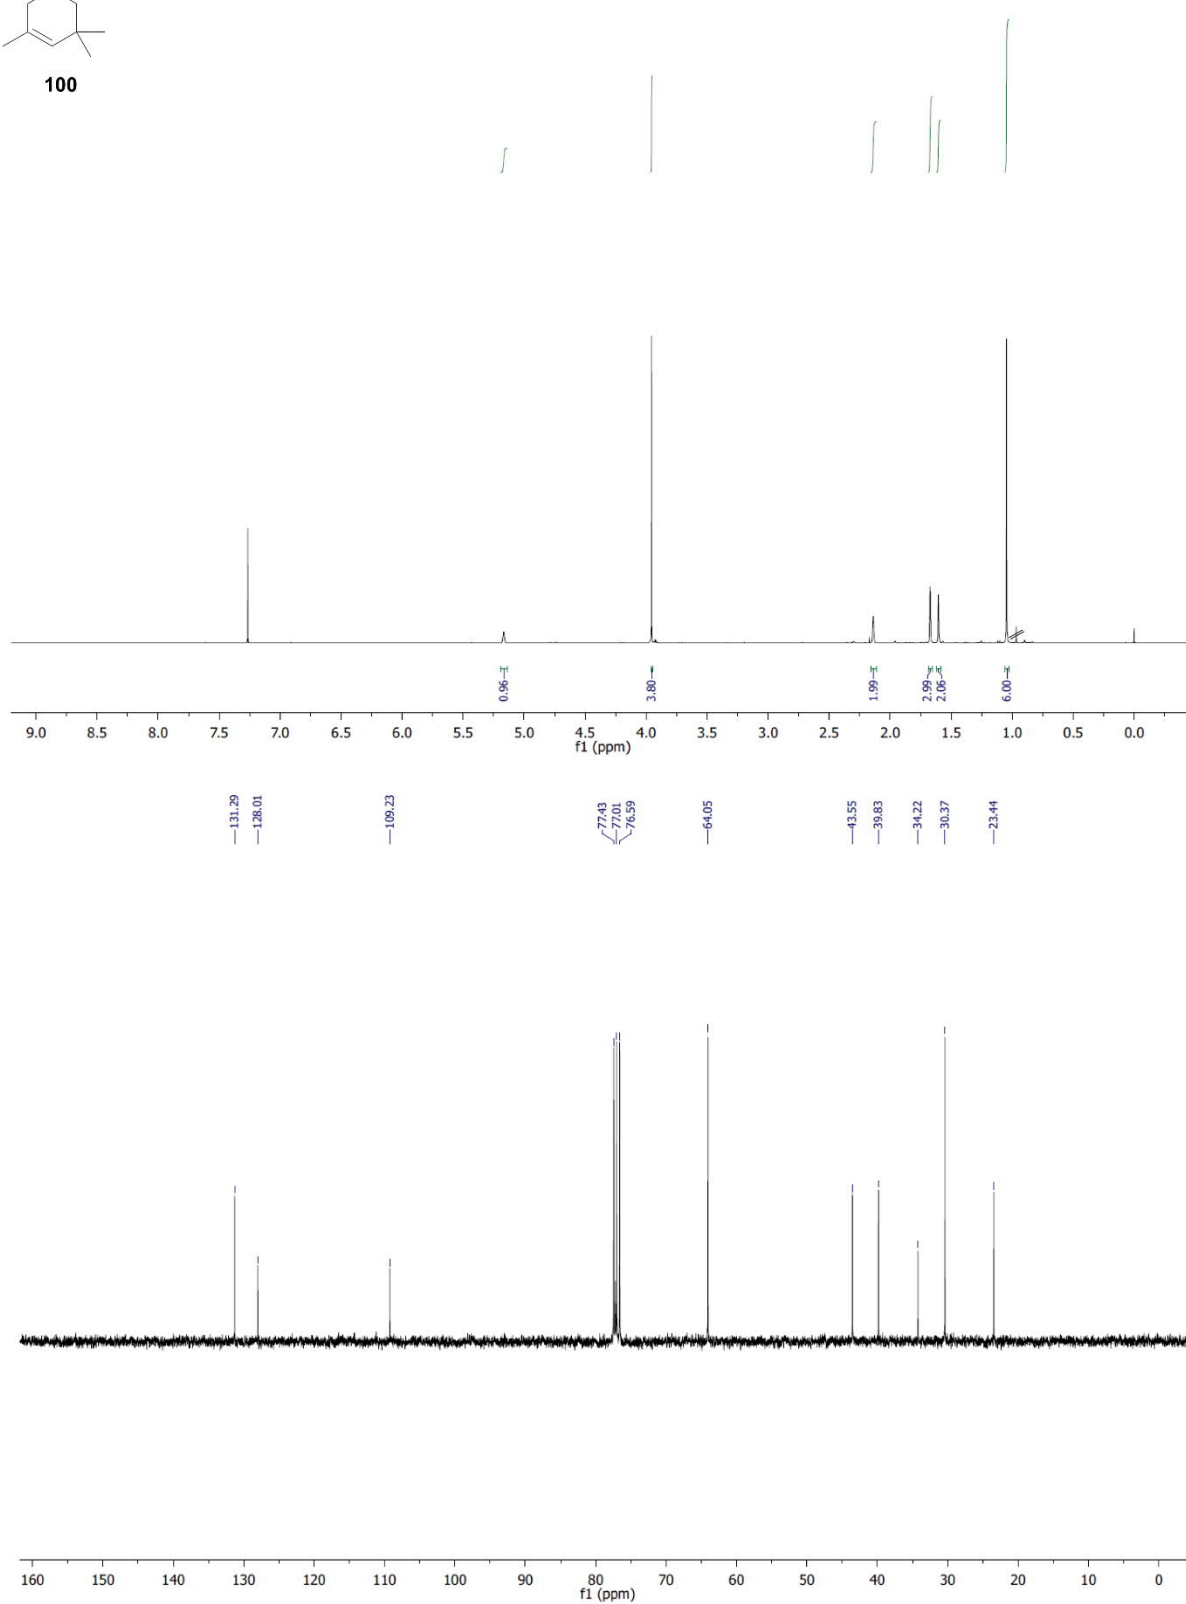

**Figure S6.**  $^1\text{H}$ - and  $^{13}\text{C}$ -NMR of 7,9,9-trimethyl-1,4-dioxaspiro[4.5]dec-7-ene (**100**).

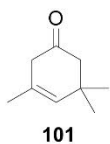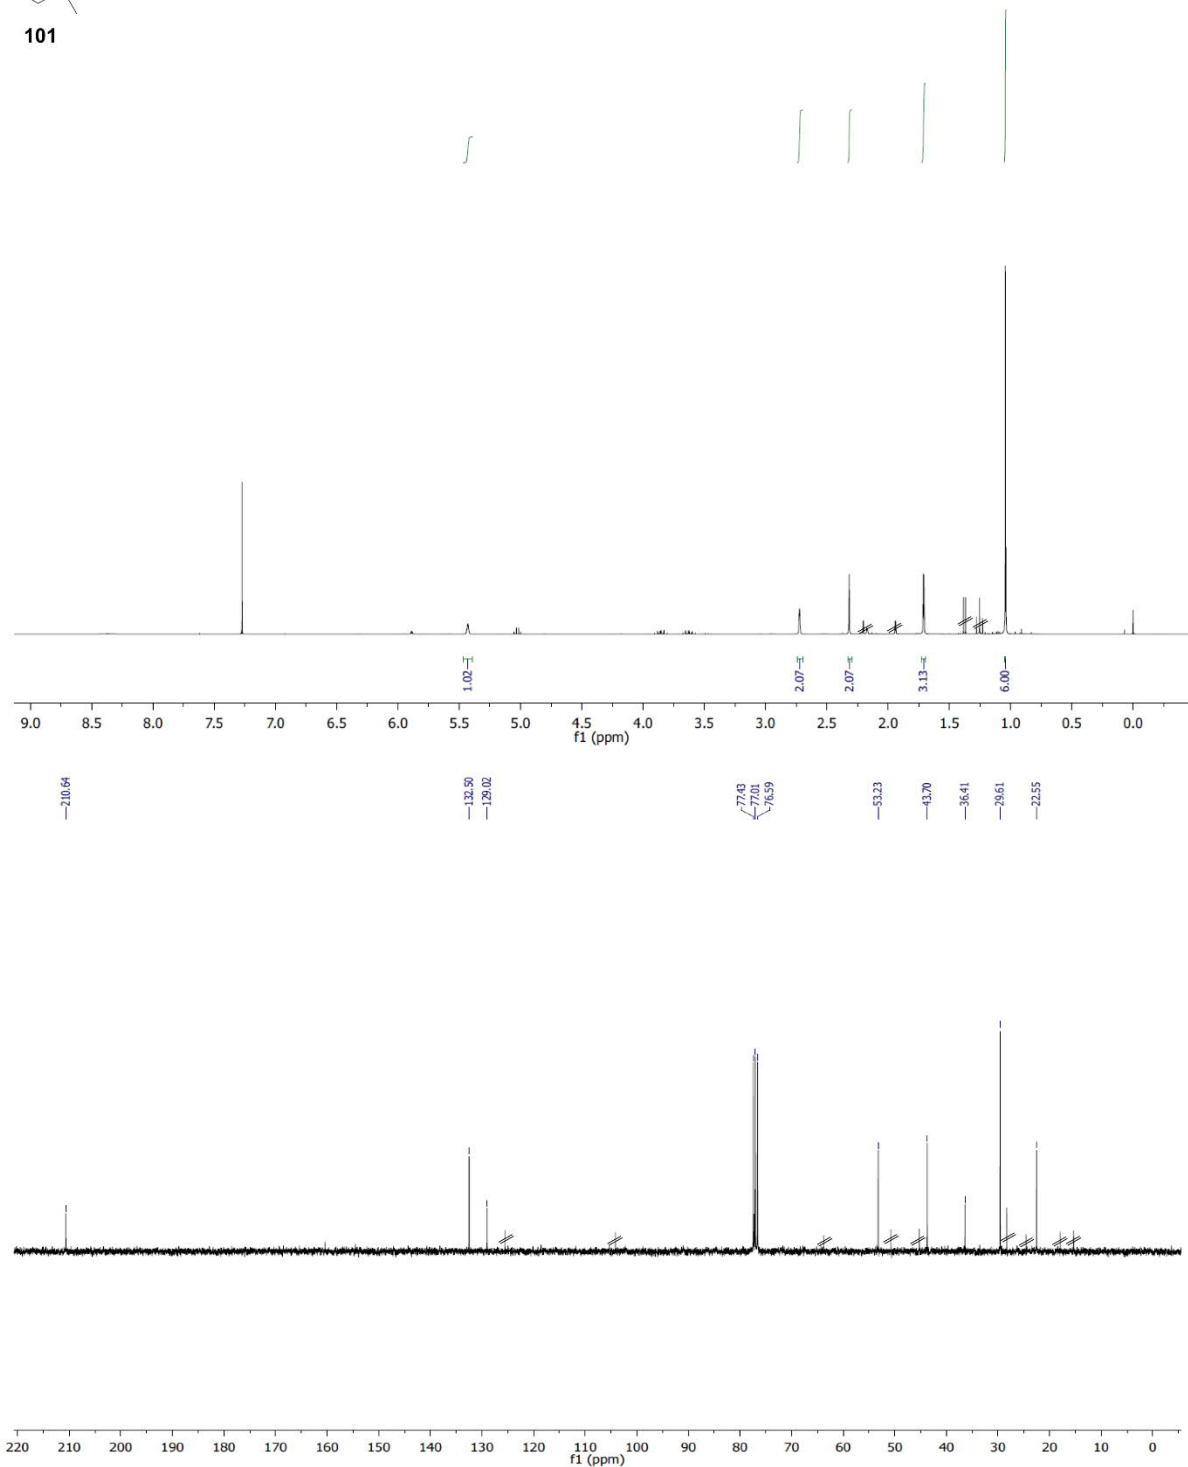

**Figure S7.** <sup>1</sup>H- and <sup>13</sup>C-NMR of 3,5,5-trimethylcyclohex-3-en-1-one (**101**).

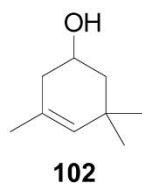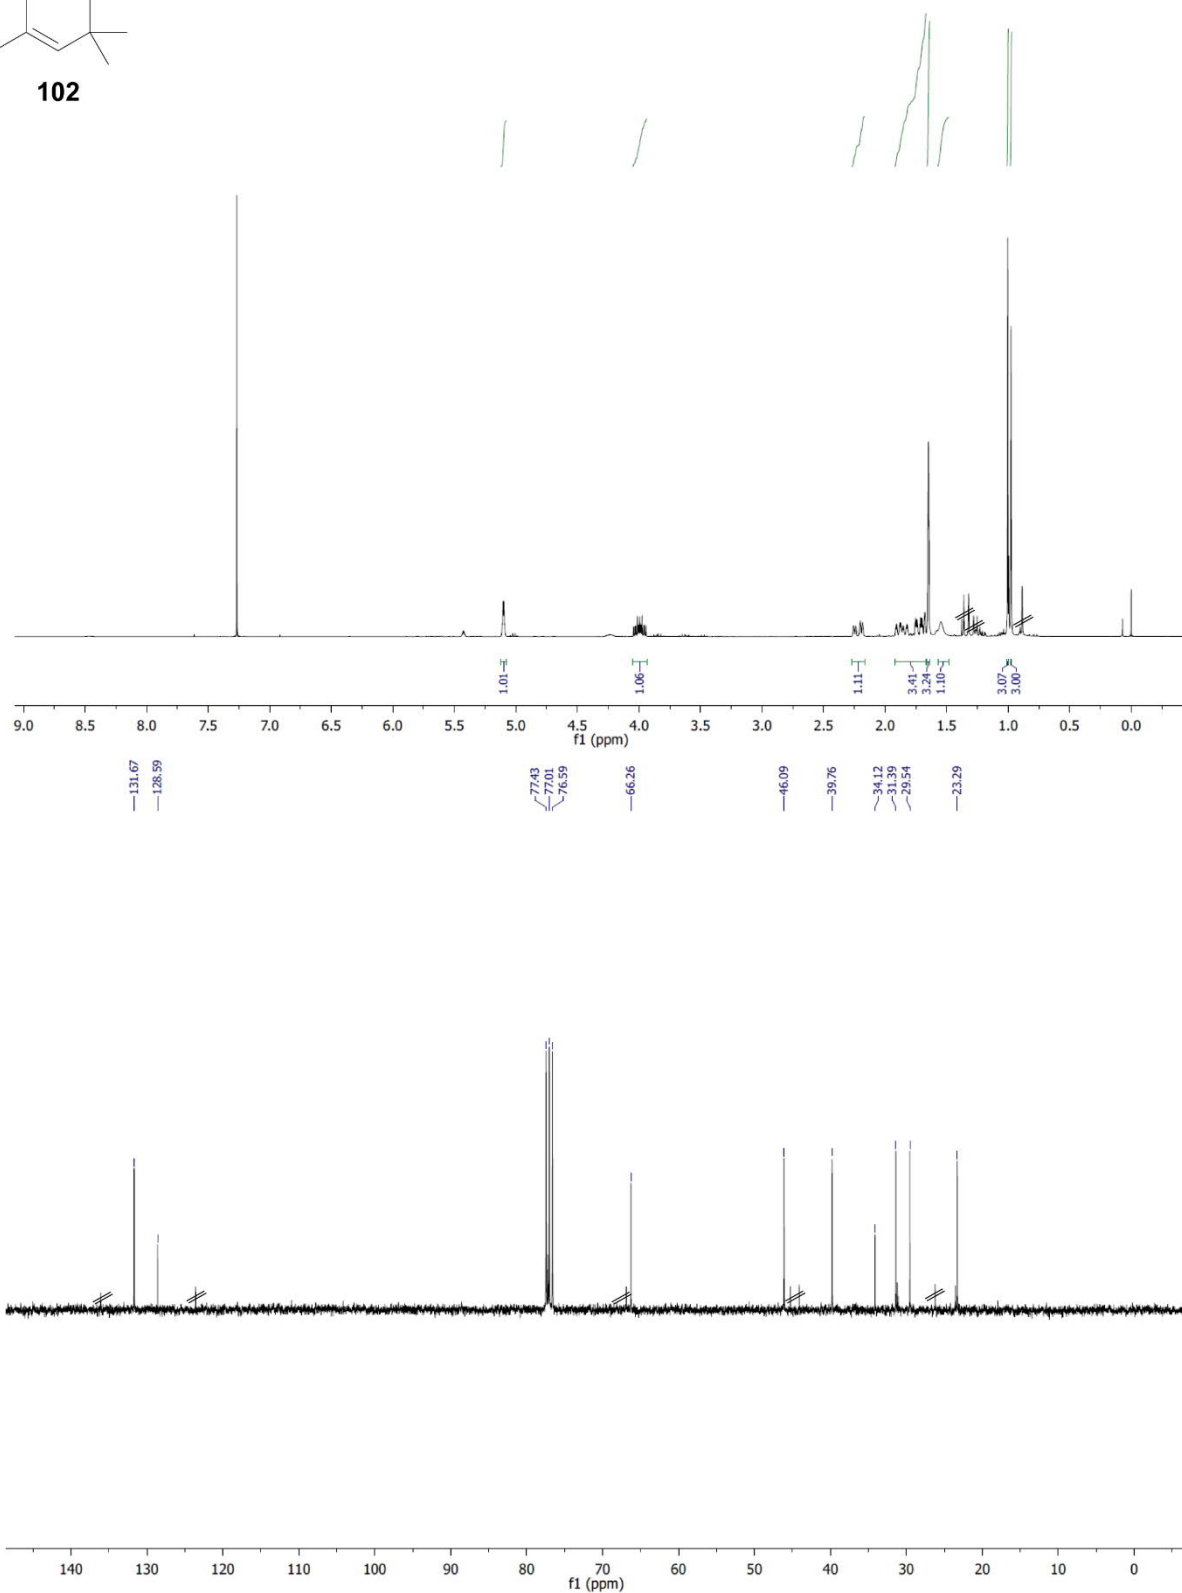

**Figure S8.** <sup>1</sup>H- and <sup>13</sup>C-NMR of 3,5,5-trimethylcyclohex-3-en-1-ol (**102**).

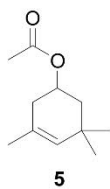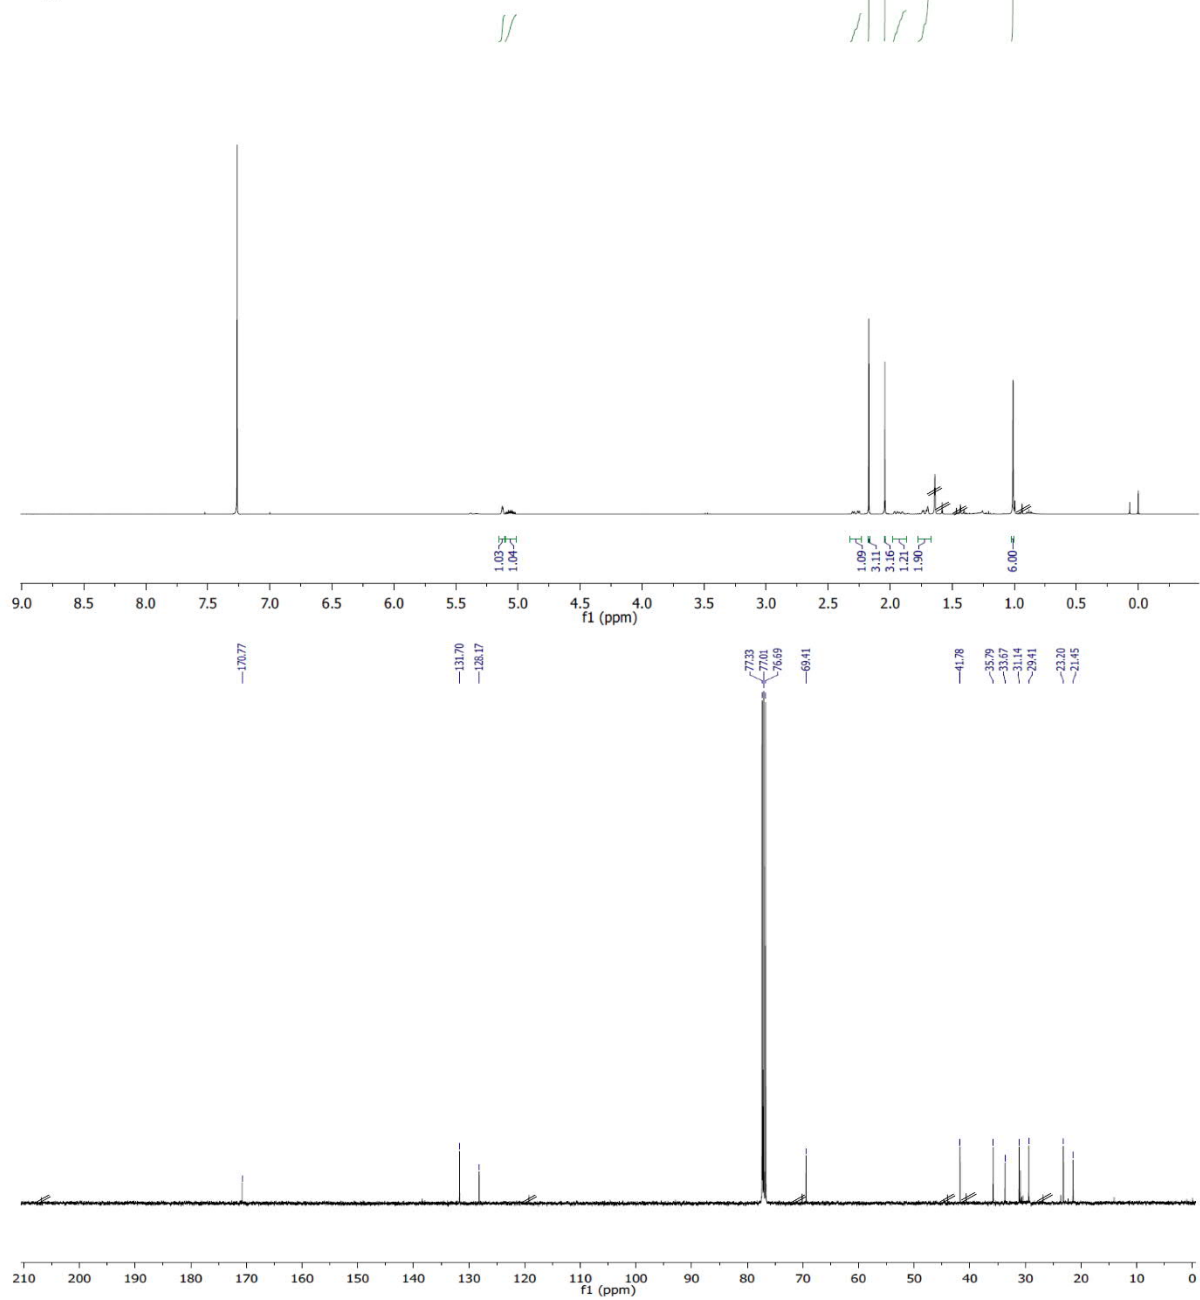

**Figure S9.** <sup>1</sup>H- and <sup>13</sup>C-NMR of 3,5,5-trimethylcyclohex-3-en-1-yl acetate (**5**).

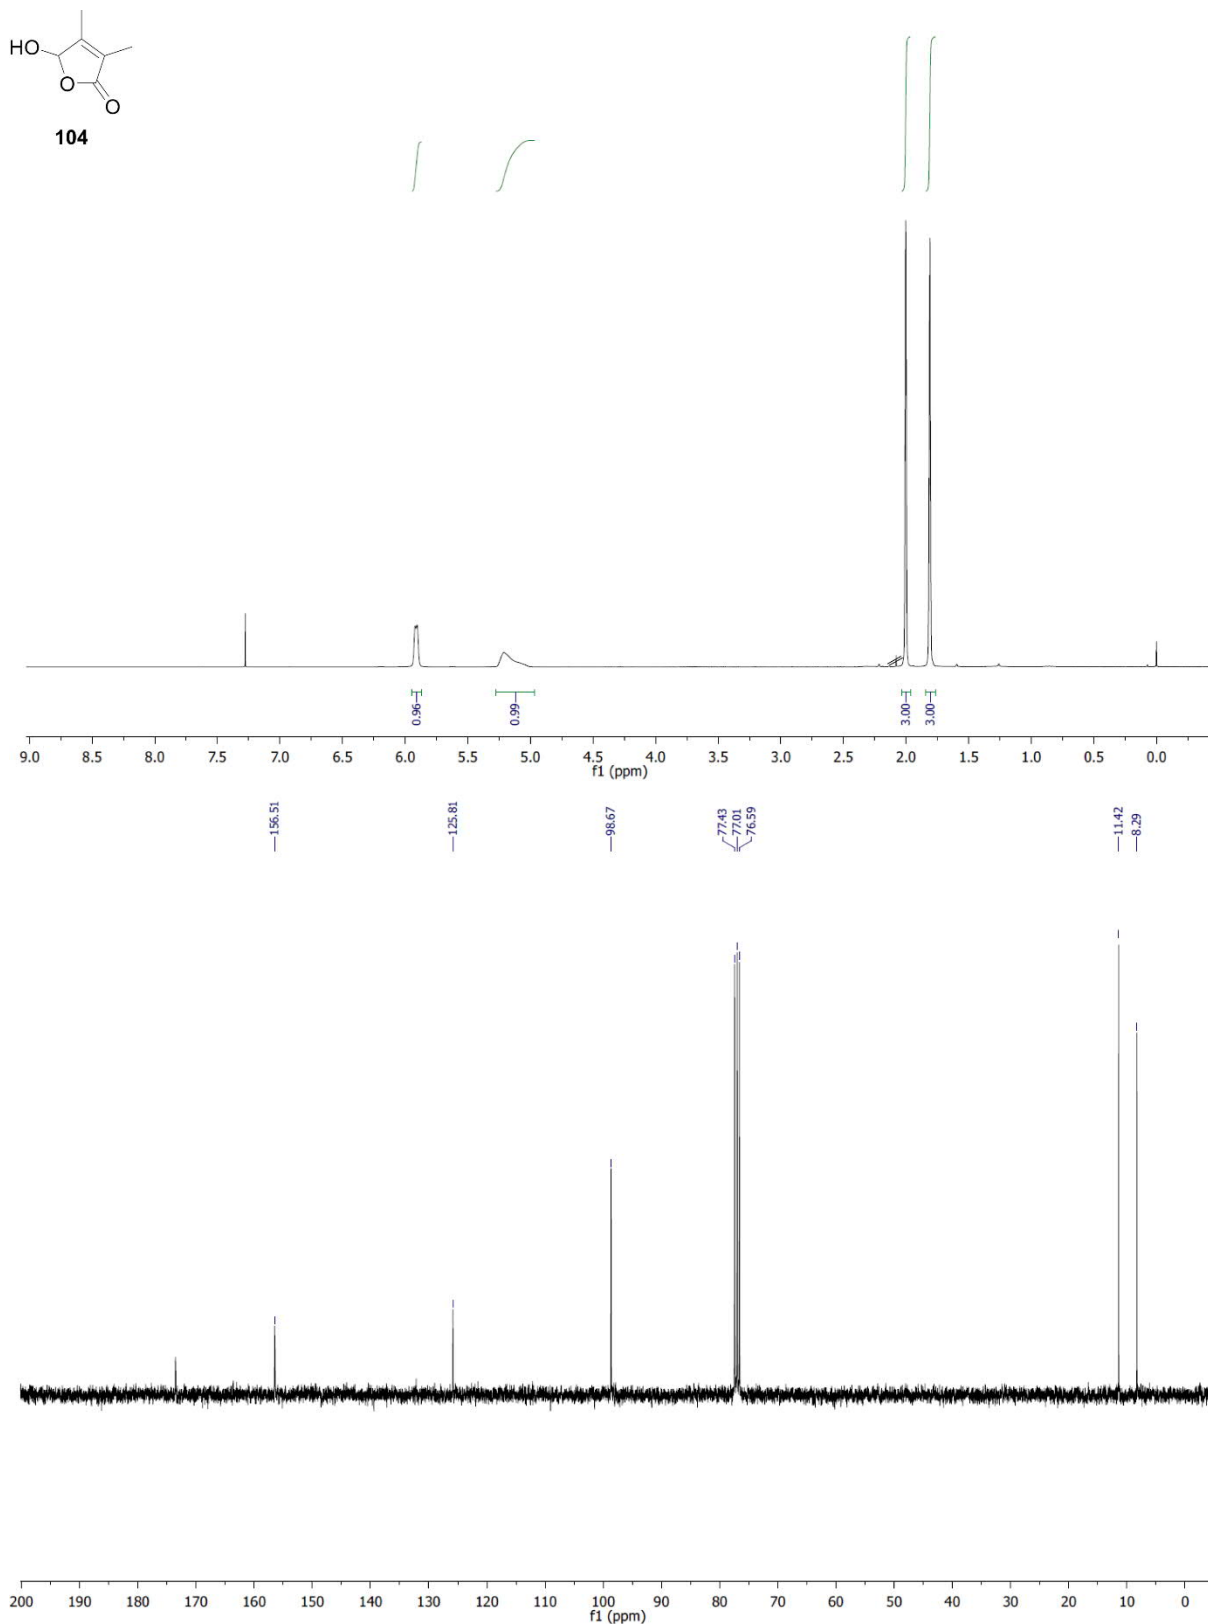

**Figure S10.**  $^1\text{H}$ - and  $^{13}\text{C}$ -NMR of 5-hydroxy-3,4-dimethylfuran-2(5H)-one (**104**).

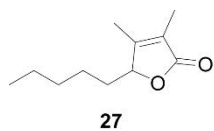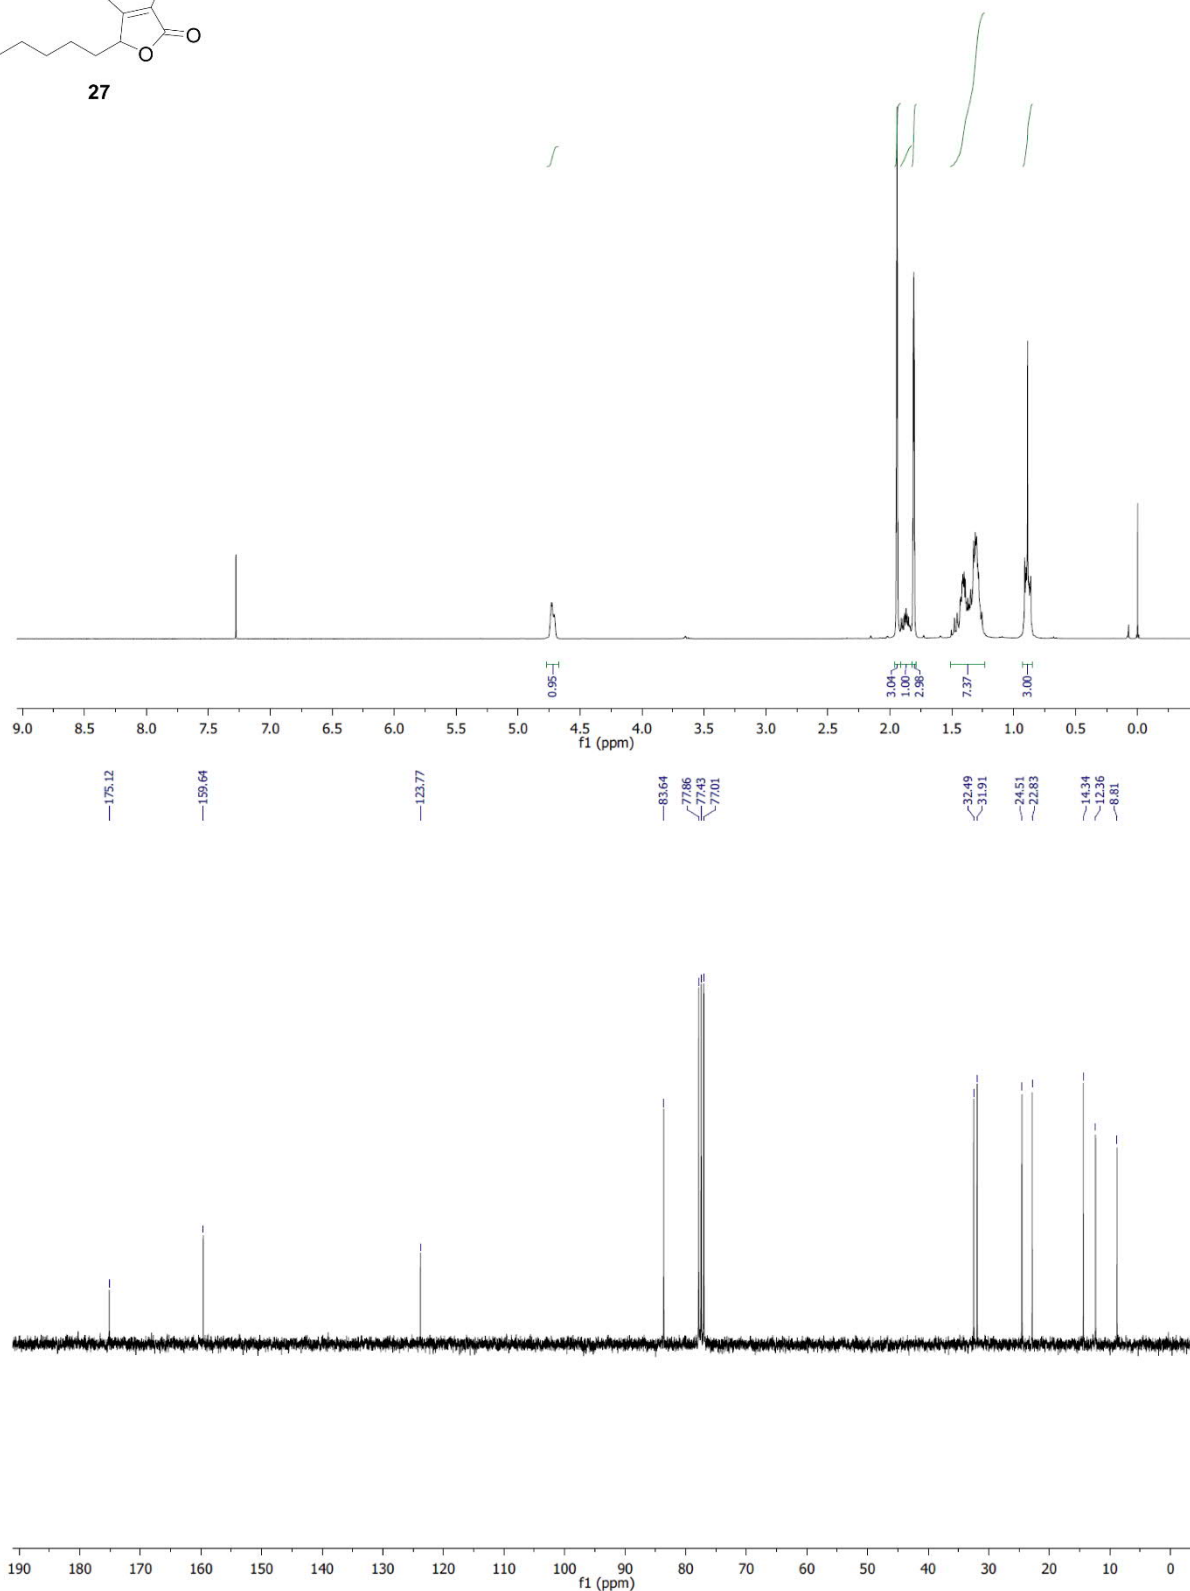

**Figure S2.** <sup>1</sup>H- and <sup>13</sup>C-NMR of 3,4-dimethyl-5-pentyl-5H-furan-2-one (**27**).



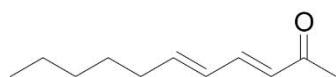

**84**

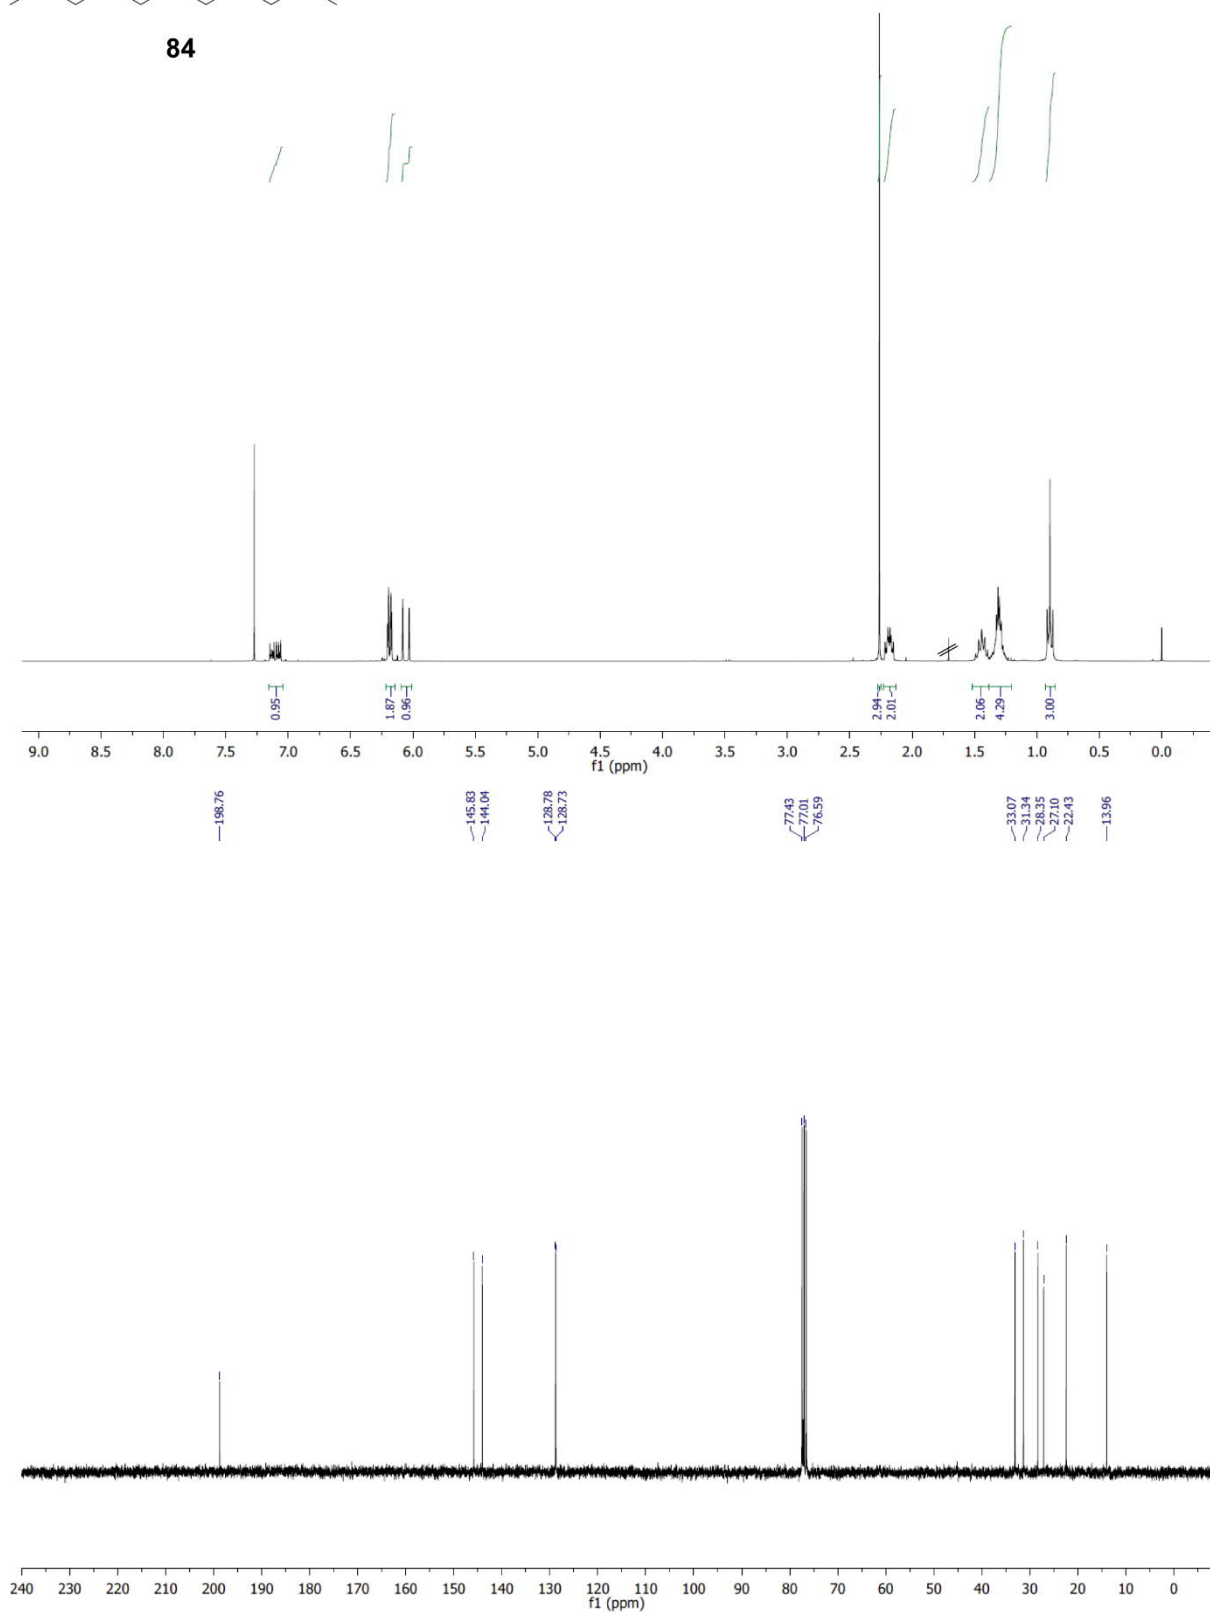

**Figure S3.** <sup>1</sup>H- and <sup>13</sup>C-NMR of (3E,5E)-undeca-3,5-dien-2-one (**84**).

## References

- [S1] a) S. Schulz, *Lipids* **2001**, 36, 637–647; b) T. Nawrath, K. Gerth, R. Müller, S. Schulz, *Chem. Biodivers.* **2010**, 7, 2228–2253.
- [S2] J. S. Dickschat, E. Helmke, S. Schulz, *Chem. Biodiversity* **2005**, 2, 318–353.
- [S3] C. A. Citron, P. Rabe, J. S. Dickschat, *J. Nat. Prod.* **2012**, 75, 1765–1776.
- [S4] D. H. Green, L. E. Llewellyn, A. P. Negri, S. I. Blackburn, C. J. Bolch, *FEMS Microbiol. Ecol.* **2004**, 47, 345–357.
- [S5] M. S. Rappé, S. A. Connon, K. L. Vergin, S. J. Giovannoni, *Nature* **2002**, 418, 630–633.
- [S6] D. J. Lane in *Nucleic acid techniques in bacterial systematics* (Eds.: E. Stackebrandt, M. Goodfellow), John Wiley and Sons Ltd, Chichester, England, **1991**, pp. 115–175.
- [S7] S.-H. Yoon, S.-M. Ha, S. Kwon, J. Lim, Y. Kim, H. Seo, J. Chun, *Int. J. Syst. Evol. Microbiol.* **2017**, 67, 1613–1617.
- [S8] L. Lippi, L. Bähr, A. Wüstenberg, A. Wilde, R. Steuer, *Algal Research* **2018**, 31, 363–366.
- [S9] S. Vacas, I. Navarro, J. Marzo, V. Navarro-Llopis, J. Primo, *J. Agric. Food Chem.* **2019**, 67, 9441–9449.
- [S10] G. V. Subbaraju, M. S. Manhas, A. K. Bose, *Synthesis* **1992**, 1992, 816–818.
- [S11] James H. Babler, Nancy Casey Malek, Michael J. Coghlan, *J. Org. Chem.* **1978**, 43, 1821–1823.
- [S12] G. Rosini, R. Ballini, V. Zanotti, *Tetrahedron* **1983**, 39, 1085–1090.
- [S13] S. T. Kadam, H. Lee, S. S. Kim, *B. Kor. Chem. Soc.* **2009**, 30, 1071–1076.
- [S14] R. Schobert, B. Barnickel, *Synthesis*, 2009, 2778–2784.
- [S15] R. Surmont, G. Verniest, N. de Kimpe, *J. Org. Chem.* **2010**, 75, 5750–5753.
- [S16] Z. Gao, S. P. Fletcher, *Chem. Commun.* **2018**, 54, 3601–3604.
- [S17] S. Schulz, A. Möllerke, *J. Chem. Ecol.* **2022**, 48, 589–597.
